# Supplementary material for: Metabolite Profiling of Rambutan (Nephelium lappaceum L.) Seeds Using UPLC-qTOF-MS/MS and Senomorphic Effects in Aged Human Dermal Fibroblasts
Source: PubMed Central journal article supplement (PMC7284571; doi:10.3390/nu12051430), 2020-05-15
Supplement: nutrients-12-01430-s001.pdf [file nutrients-12-01430-s001.pdf]

# **Metabolite Profiling of Rambutan (*Nephelium lappaceum* L.) Seeds using UPLC-qTOF-MS/MS and Senomorphic Effects in Aged Human Dermal Fibroblasts**

**Yae Rin Lee <sup>1,†</sup>, Hyo Moon Cho <sup>1,†</sup>, Eun Jin Park <sup>1</sup>, Mi Zhang <sup>1</sup>, Thi Phuong Doan <sup>1</sup>, Ba Wool  
Lee <sup>1</sup>, Kyung A Cho <sup>2</sup> and Won Keun Oh <sup>1,\*</sup>**

<sup>1</sup> Korea Bioactive Natural Material Bank, Research Institute of Pharmaceutical Sciences,  
College of Pharmacy, Seoul National University, Seoul 08826, Republic of Korea;

leeyarin93@snu.ac.kr (Y.R.L); chgyans@naver.com (H.M.C); eunjin\_p@snu.ac.kr (E.J.P);

mintazhang@snu.ac.kr (M.Z); phuongoan@snu.ac.kr (T.P.D); paul36@snu.ac.kr (B.W.L);

wkoh1@snu.ac.kr (W.K.O)

<sup>2</sup> Department of Biochemistry, Chonnam National University Medical School, Gwangju  
51828, Korea; kacho@jnu.ac.kr (K.A.C)

\* Correspondence: wkoh1@snu.ac.kr; Tel.: +82-2-880-7872

† These authors contributed equally to this work.

## **Contents:**

**Figure S1:**  $^1\text{H}$  NMR spectrum of compound **1** (600 MHz,  $\text{DMSO-}d_6$ ).

**Figure S2:**  $^{13}\text{C}$  NMR spectrum of compound **1** (150 MHz,  $\text{DMSO-}d_6$ ).

**Figure S3:** IR spectrum of compound **1**.

**Figure S4:** Fragmentation pathway of compound **1**.

**Figure S5:**  $^1\text{H}$  NMR spectrum of compound **2** (500 MHz,  $\text{DMSO-}d_6$ ).

**Figure S6:**  $^{13}\text{C}$  NMR spectrum of compound **2** (125 MHz,  $\text{DMSO-}d_6$ ).

**Figure S7:** IR spectrum of compound **2**.

**Figure S8:** Fragmentation pathway of compound **2**.

**Figure S9:**  $^1\text{H}$  NMR spectrum of compound **3** (600 MHz,  $\text{DMSO-}d_6$ ).

**Figure S10:**  $^{13}\text{C}$  NMR spectrum of compound **3** (150 MHz,  $\text{DMSO-}d_6$ ).

**Figure S11:** IR spectrum of compound **3**.

**Figure S12:** Fragmentation pathway of compound **3**.

**Figure S13:**  $^1\text{H}$  NMR spectrum of compound **4** (400 MHz,  $\text{Methanol-}d_4$ ).

**Figure S14:**  $^{13}\text{C}$  NMR spectrum of compound **4** (100 MHz, Methanol- $d_4$ ).

**Figure S15:** IR spectrum of compound **4**.

**Figure S16:** Fragmentation pathway of compound **4**.

**Figure S17:**  $^1\text{H}$  NMR spectrum of compound **5** (500 MHz, Methanol- $d_4$ ).

**Figure S18:**  $^{13}\text{C}$  NMR spectrum of compound **5** (125 MHz, Methanol- $d_4$ ).

**Figure S19:** IR spectrum of compound **5**.

**Figure S20:** Fragmentation pathway of compound **5**.

**Figure S21:**  $^1\text{H}$  NMR spectrum of compound **6** (600 MHz, DMSO- $d_6$ ).

**Figure S22:**  $^{13}\text{C}$  NMR spectrum of compound **6** (150 MHz, DMSO- $d_6$ ).

**Figure S23:** IR spectrum of compound **6**.

**Figure S24:** Fragmentation pathway of compound **6**.

**Figure S25:**  $^1\text{H}$  NMR spectrum of compound **7** (600 MHz, DMSO- $d_6$ ).

**Figure S26:**  $^{13}\text{C}$  NMR spectrum of compound **7** (150 MHz, DMSO- $d_6$ ).

**Figure S27:** HSQC NMR spectrum of compound **7** (600 MHz, DMSO- $d_6$ ).

**Figure S28:** HMBC NMR spectrum of compound **7** (600 MHz, DMSO- $d_6$ ).

**Figure S29:**  $^1\text{H}$ - $^1\text{H}$  COSY NMR spectrum of compound **7** (600 MHz,  $\text{DMSO-}d_6$ ).

**Figure S30:** IR spectrum of compound **7**.

**Figure S31:** HRESIMS spectrum of compound **7**.

**Figure S32:**  $^1\text{H}$  NMR spectrum of compound **8** (400 MHz,  $\text{Methanol-}d_4$ ).

**Figure S33:**  $^{13}\text{C}$  NMR spectrum of compound **8** (100 MHz,  $\text{Methanol-}d_4$ ).

**Figure S34:** IR spectrum of compound **8**.

**Figure S35:** Fragmentation pathway of compound **8**.

**Figure S36:**  $^1\text{H}$  NMR spectrum of compound **9** (500 MHz,  $\text{DMSO-}d_6$ ).

**Figure S37:**  $^{13}\text{C}$  NMR spectrum of compound **9** (125 MHz,  $\text{DMSO-}d_6$ ).

**Figure S38:** IR spectrum of compound **9**.

**Figure S39:** Fragmentation pathway of compound **9**.

**Figure S40:** Sugar Analysis. Compound **7** (2.5 mg) was heated in 0.1 mL at  $110^\circ\text{C}$  for 1.5 h of 2 M HCl. After acid hydrolyzed sample was neutralized with  $\text{Na}_2\text{CO}_3$  and dried. The residue was derivatized with L-cysteine methyl ester hydrochloride in anhydrous pyridine (200  $\mu\text{L}$ ,  $60^\circ\text{C}$ , 1 h) and subsequently added phenylisothiocyanate (1  $\mu\text{L}$ ,  $60^\circ\text{C}$ , 1 h). The

sugar derivatives from compound **7** were compared with standard sugar derivatives by the HPLC analysis and were confirm the absolute configuration of these sugars to be D-glucose, and L-rhamnose.

**Figure S41:** Molecular Networking

**Figure S42:** Effect of *N. lappaceum* peel, pulp and seed on p16Ink4A and SA- $\beta$ -gal promoter activity in human dermal fibroblasts.

**Figure S43:** Annotation of the molecular networking of the crude extract from *N. lappaceum* pulp (red nodes), peel (Aquamarine nodes), seed (green nodes) which shows flavonoid, ellagitannin, gallotannin and sugar.

**Figure S44:** DAD chromatograms of crude extract of *N. lappaceum* pulp (A), peel (B), and seed (C) at 280 nm. (D) major compounds of pulp, peel and seed extracts of *N. lappaceum* identified in corresponding MS / MS fragmentation profiles.

**Figure S45:** Effect of total extract and four fractions on p16INK4A and SA- $\beta$ -gal transcription in human dermal fibroblasts. Human dermal fibroblasts were transiently co-transfected with pGL3-p16ink4a (A) or pGL3-glb1 (B) promoter with  $\beta$ -galactosidase as a transfection control.

**Figure S46:** The cytotoxicity effect of total extract and four fractions 20  $\mu$ g/mL (A) and 10  $\mu$ M compounds **1-9** obtained from *N. lappaceum* seeds (B) both in young and senescent

HDFs. After 24 h of incubation with tested fractions and compounds, the MTT assay was carried out as described in the experimental section.

**Figure S47:** Senescence-associated  $\beta$ -galactosidase staining of HDFs. Young and aged HDFs stained for 24h for SA- $\beta$ -galactosidase. Images of young HDFs (passage 14) had little staining, while aged HDFs (passage 39) stained blue.

**Figure S48:** Quantification of senescence-associated  $\beta$ -galactosidase staining. Aged HDF cells were treated three times over 6 days with vehicle or 10  $\mu$ M compounds **2**, **4**, and **9** and quantified through images obtained from a fluorescence microscope.

**Figure S49:** Mechanism of action of compounds **2**, **4**, and **9** isolated from Rambutan.

**Table S1:**  $^1\text{H}$  NMR data for compounds **1–6**, **8** and **9**.

**Table S2:**  $^{13}\text{C}$  NMR data for compounds **1–6**, **8** and **9**.

**Table S3.**  $^1\text{H}$  and  $^{13}\text{C}$  NMR data for compound **7**.

**Table S4:** Sequence of primer used in qRT-PCR.

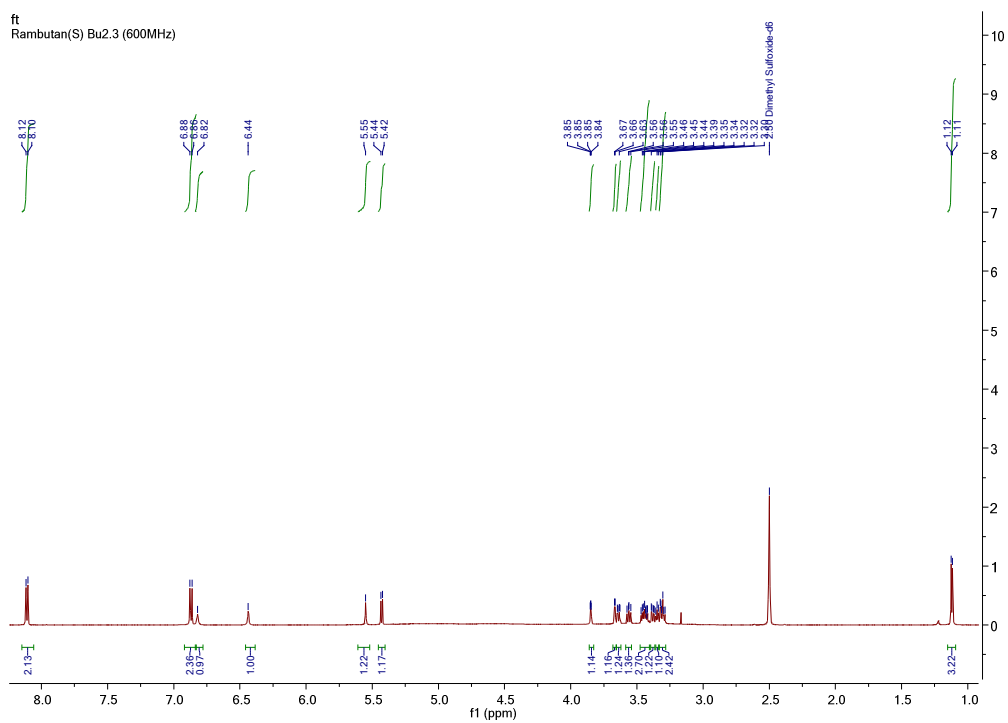

**Figure S1:** <sup>1</sup>H NMR spectrum of compound **1** (600 MHz, DMSO-*d*<sub>6</sub>).

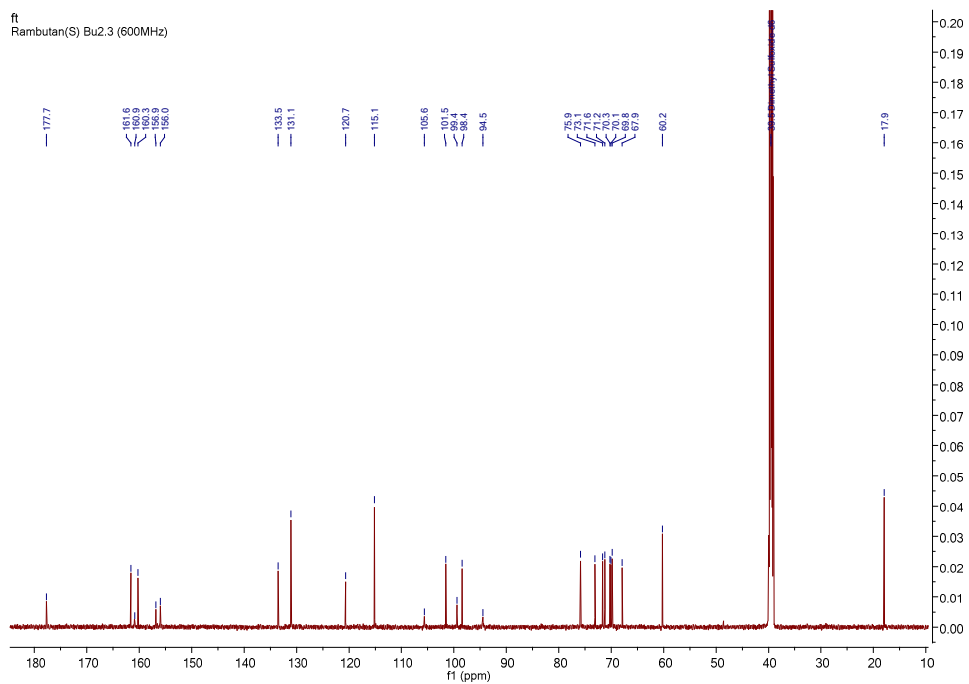

**Figure S2:** <sup>13</sup>C NMR spectrum of compound **1** (150 MHz, DMSO-*d*<sub>6</sub>).

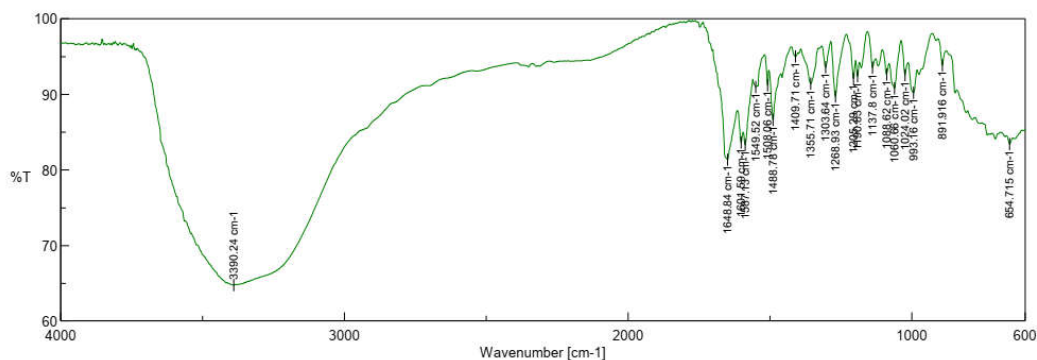

|                    |                    |                           |                 |
|--------------------|--------------------|---------------------------|-----------------|
| [Comment]          |                    | [Measurement Information] |                 |
| Sample Name        | rambutane.Bu2.3    | Model Name                | FT/IR-4200typeA |
| Comment            |                    | Serial Number             | B038361018      |
| User               |                    | Light Source              | Standard        |
| Division           |                    | Detector                  | TGS             |
| Company            | 공통기기실              | Accumulation              | Auto (30)       |
|                    |                    | Resolution                | 4 cm-1          |
|                    |                    | Zero Filling              | On              |
| [Data Information] |                    | Apodization               | Cosine          |
| Creation Date      | 2019-08-24 오후 4:29 | Gain                      | Auto (2)        |
| Data array type    | Linear data array  | Aperture                  | Auto (7.1 mm)   |
| Horizontal         | Wavenumber [cm-1]  | Scanning Speed            | Auto (2 mm/sec) |
| Vertical           | %T                 | Filter                    | Auto (30000 Hz) |
| Start              | 599.753 cm-1       |                           |                 |
| End                | 4000.6 cm-1        |                           |                 |
| Data pitch         | 0.964233 cm-1      |                           |                 |
| Data points        | 3528               |                           |                 |

Figure S3: IR spectrum of compound 1.

### Peak 1

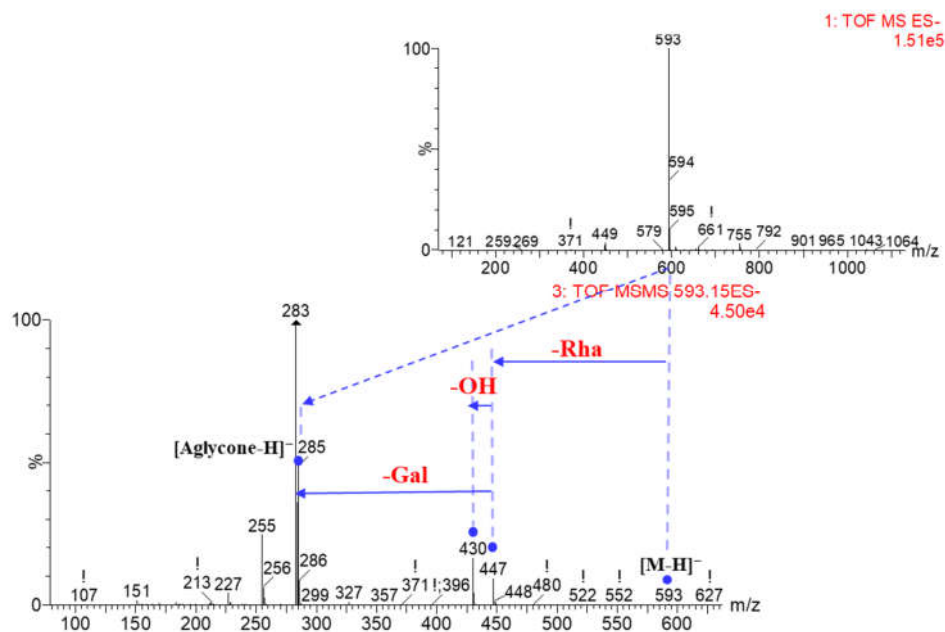

Figure S4: Fragmentation pathway of compound 1.



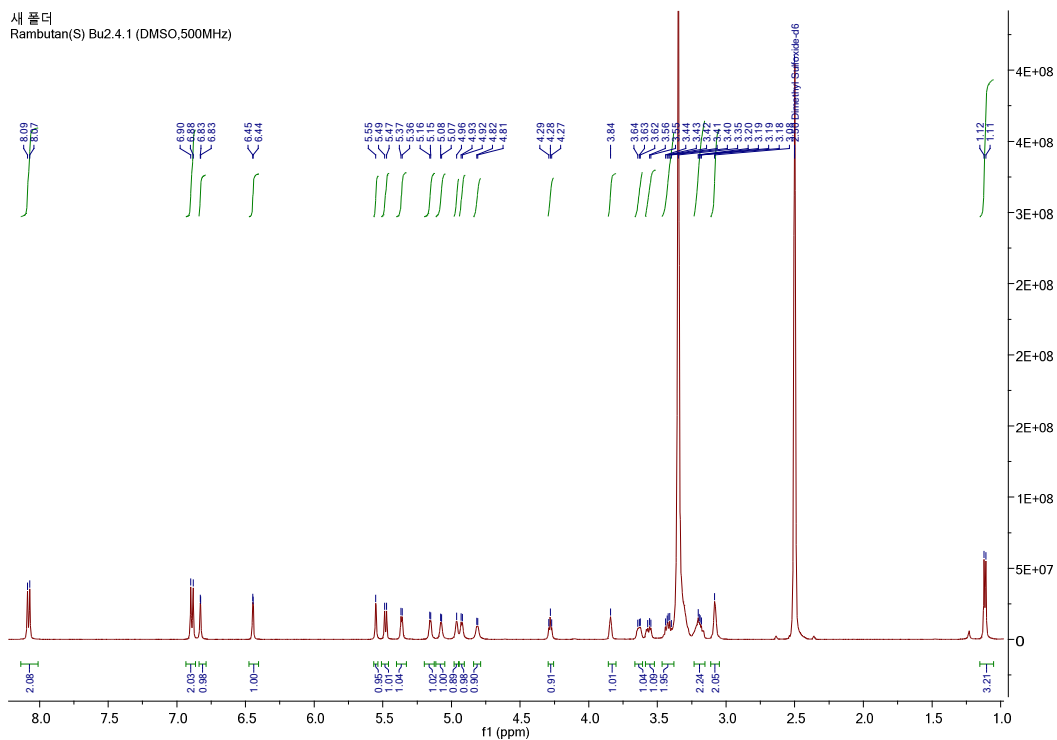

Figure S5:  $^1\text{H}$  NMR spectrum of compound **2** (500 MHz,  $\text{DMSO-d}_6$ ).

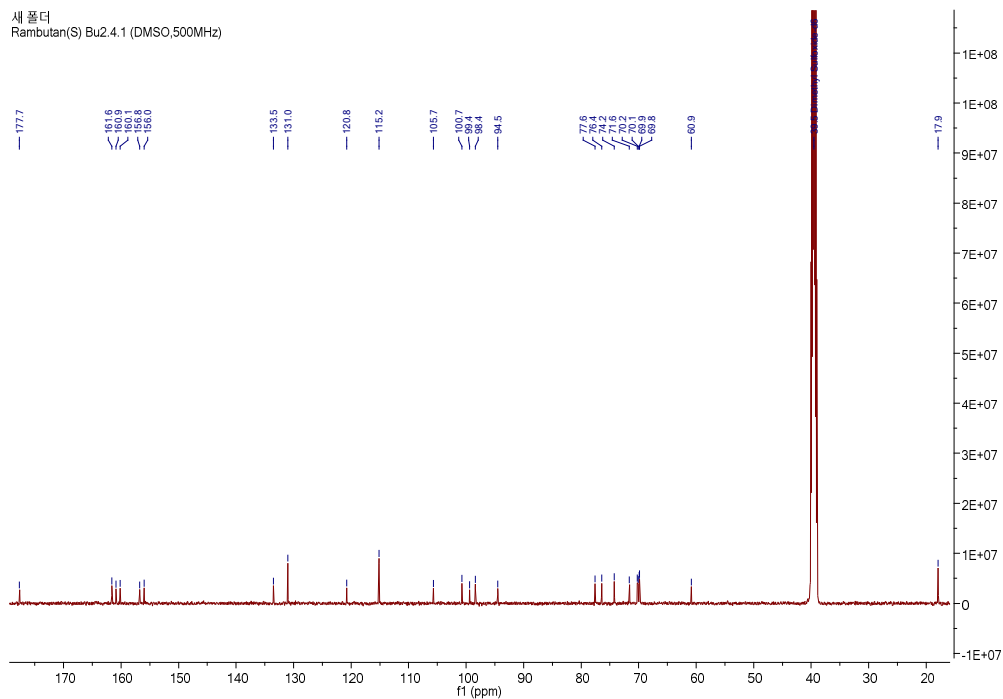

Figure S6:  $^{13}\text{C}$  NMR spectrum of compound **2** (125 MHz,  $\text{DMSO-d}_6$ ).

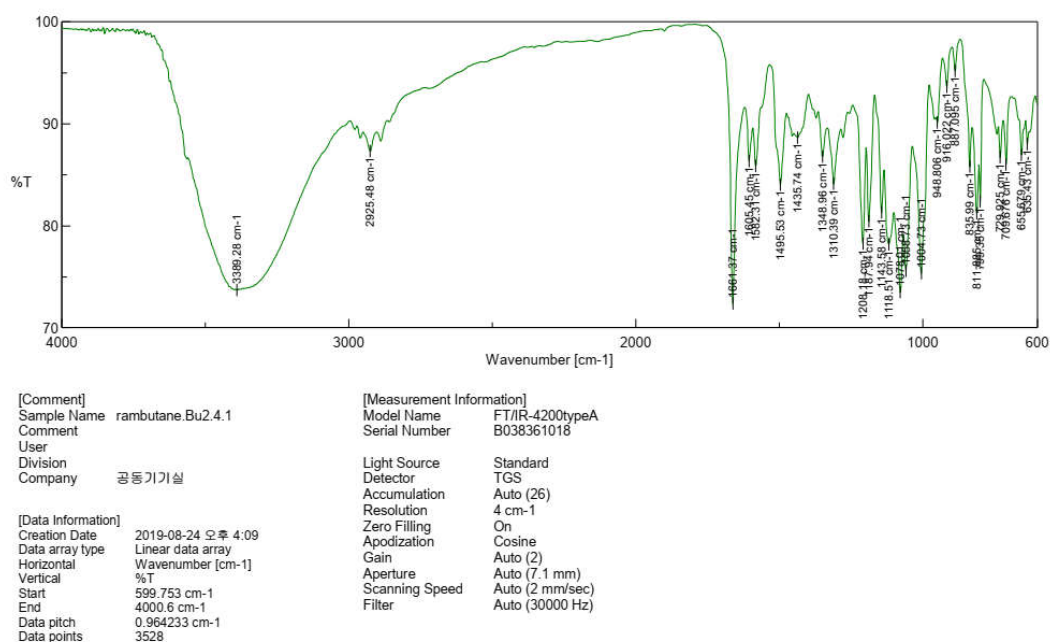

Figure S7: IR spectrum of compound 2.

Peak 2

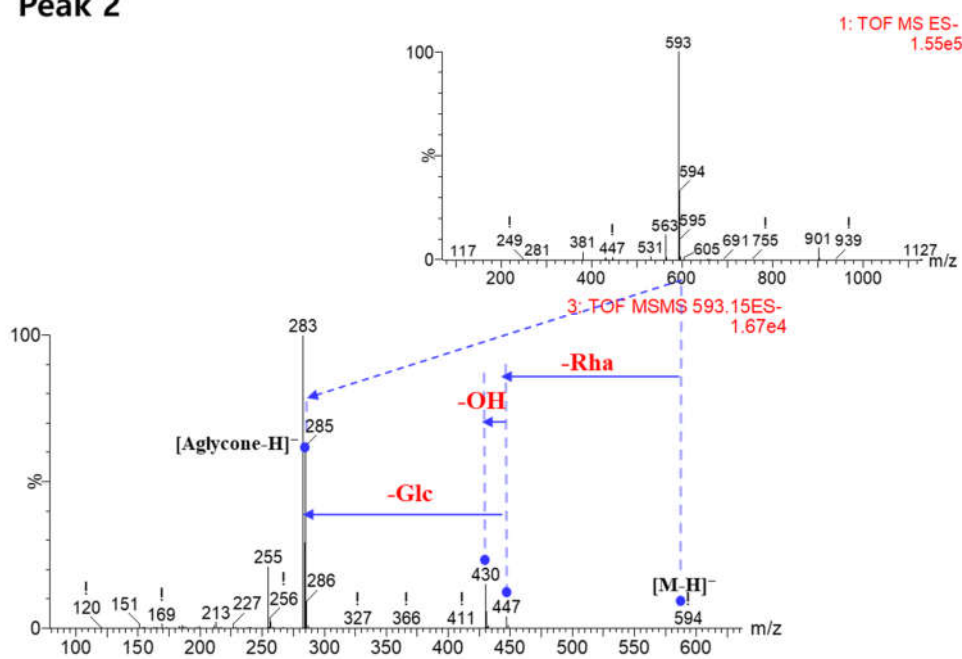

Figure S8: Fragmentation pathway of compound 2.

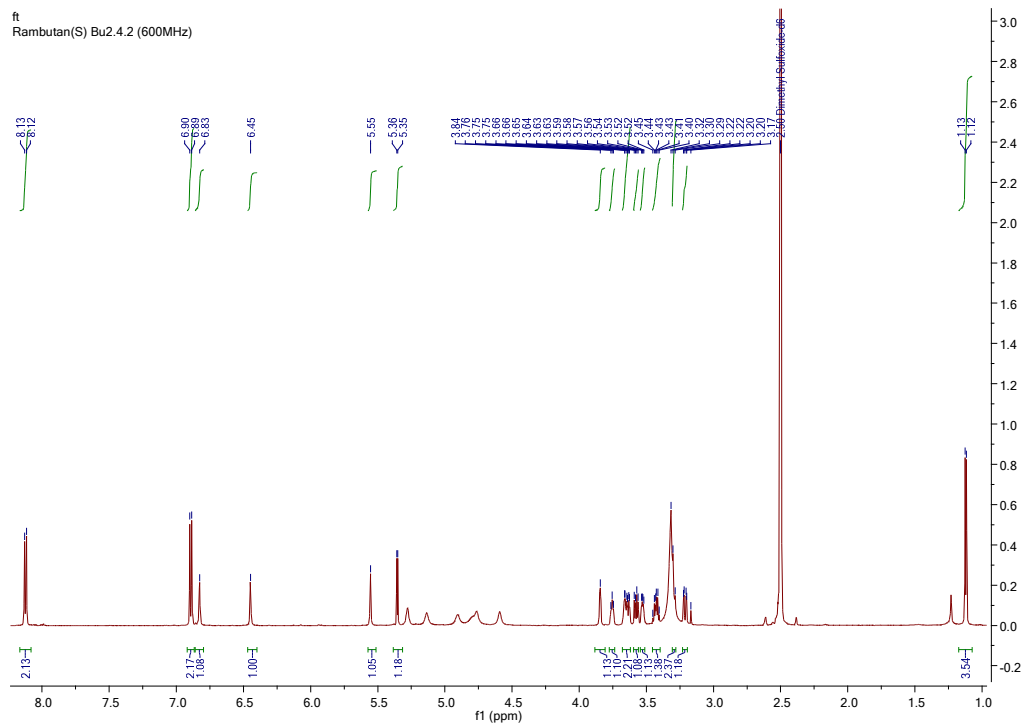

**Figure S9:**  $^1\text{H}$  NMR spectrum of compound **3** (600 MHz,  $\text{DMSO}-d_6$ ).

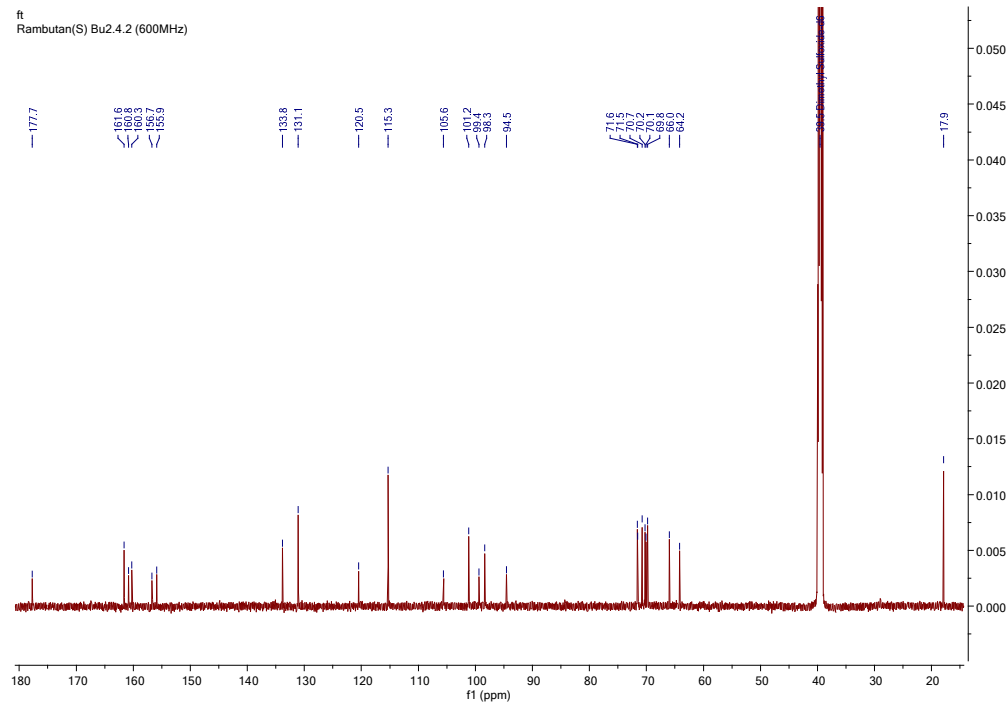

**Figure S10:**  $^{13}\text{C}$  NMR spectrum of compound **3** (150 MHz,  $\text{DMSO}-d_6$ ).

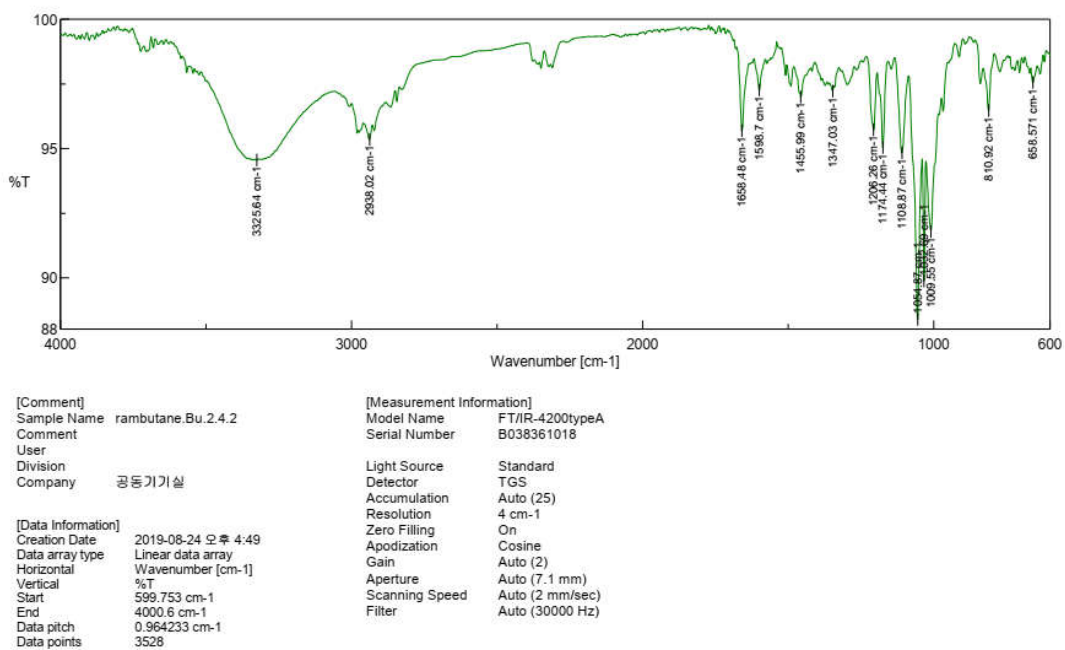

Figure S11: IR spectrum of compound 3.

Peak 3

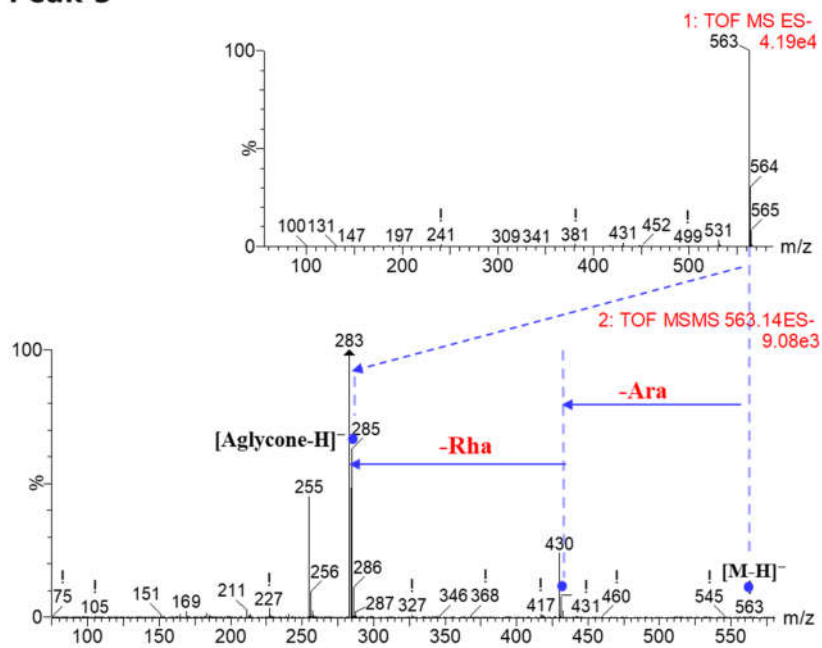

Figure S12: Fragmentation pathway of compound 3.

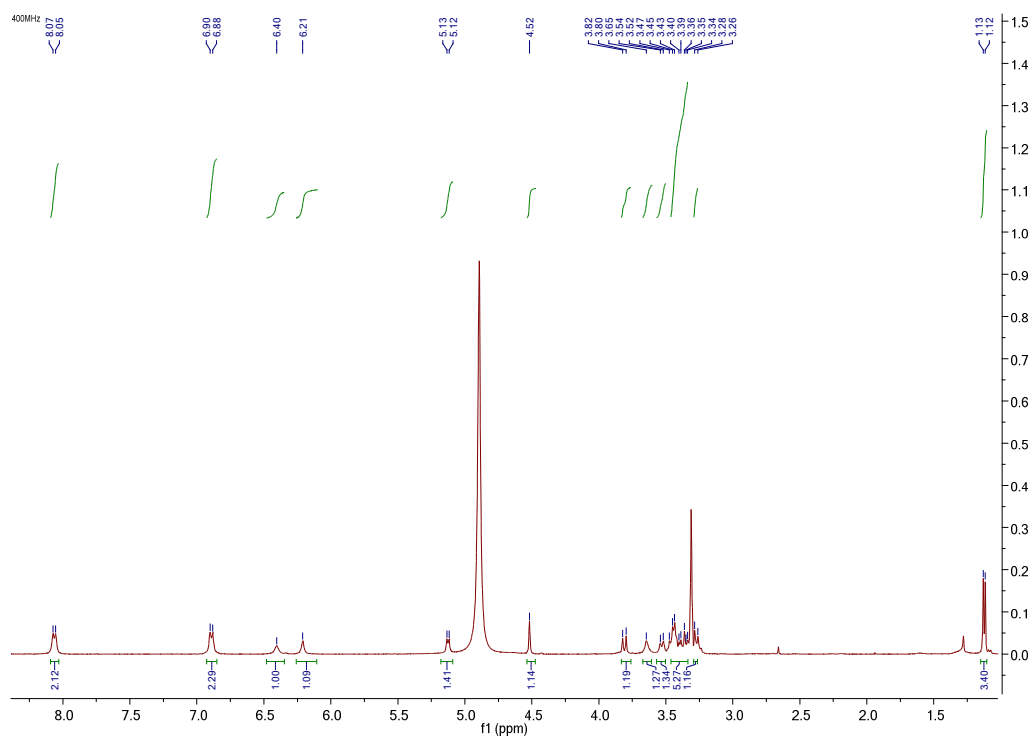

Figure S13:  $^1\text{H}$  NMR spectrum of compound **4** (400 MHz, Methanol- $d_4$ ).

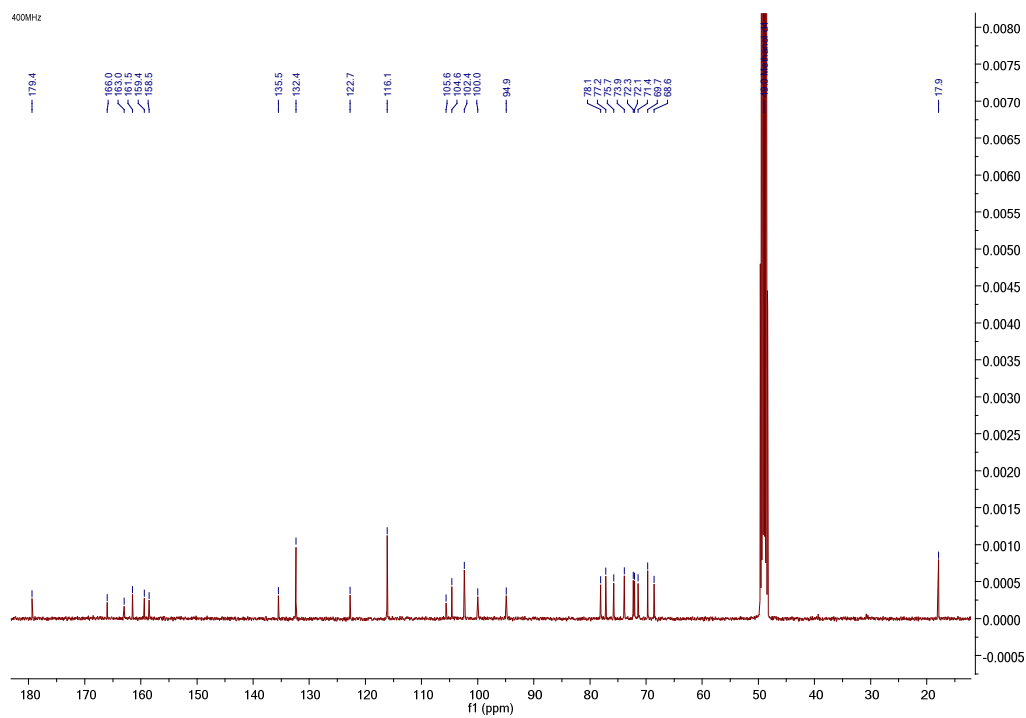

Figure S14:  $^{13}\text{C}$  NMR spectrum of compound **4** (100 MHz, Methanol- $d_4$ ).

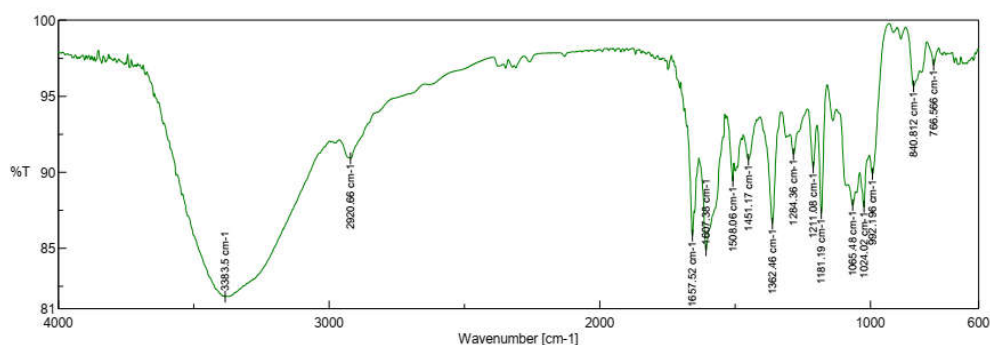

|                    |                    |                           |                 |
|--------------------|--------------------|---------------------------|-----------------|
| [Comment]          |                    | [Measurement Information] |                 |
| Sample Name        | rambutane.Bu2.1.R  | Model Name                | FT/IR-4200typeA |
| Comment            |                    | Serial Number             | B038361018      |
| User               |                    | Light Source              | Standard        |
| Division           |                    | Detector                  | TGS             |
| Company            | 공동기기실              | Accumulation              | Auto (22)       |
|                    |                    | Resolution                | 4 cm-1          |
| [Data Information] |                    | Zero Filling              | On              |
| Creation Date      | 2019-08-24 오후 4:38 | Apodization               | Cosine          |
| Data array type    | Linear data array  | Gain                      | Auto (2)        |
| Horizontal         | Wavenumber [cm-1]  | Aperture                  | Auto (7.1 mm)   |
| Vertical           | %T                 | Scanning Speed            | Auto (2 mm/sec) |
| Start              | 599.753 cm-1       | Filter                    | Auto (30000 Hz) |
| End                | 4000.6 cm-1        |                           |                 |
| Data pitch         | 0.964233 cm-1      |                           |                 |
| Data points        | 3528               |                           |                 |

Figure S15: IR spectrum of compound 4.

Peak 4

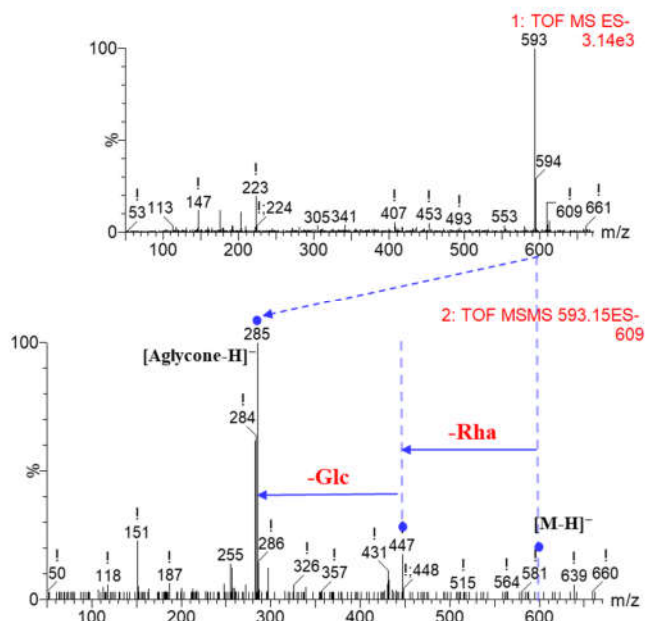

Figure S16: Fragmentation pathway of compound 4.

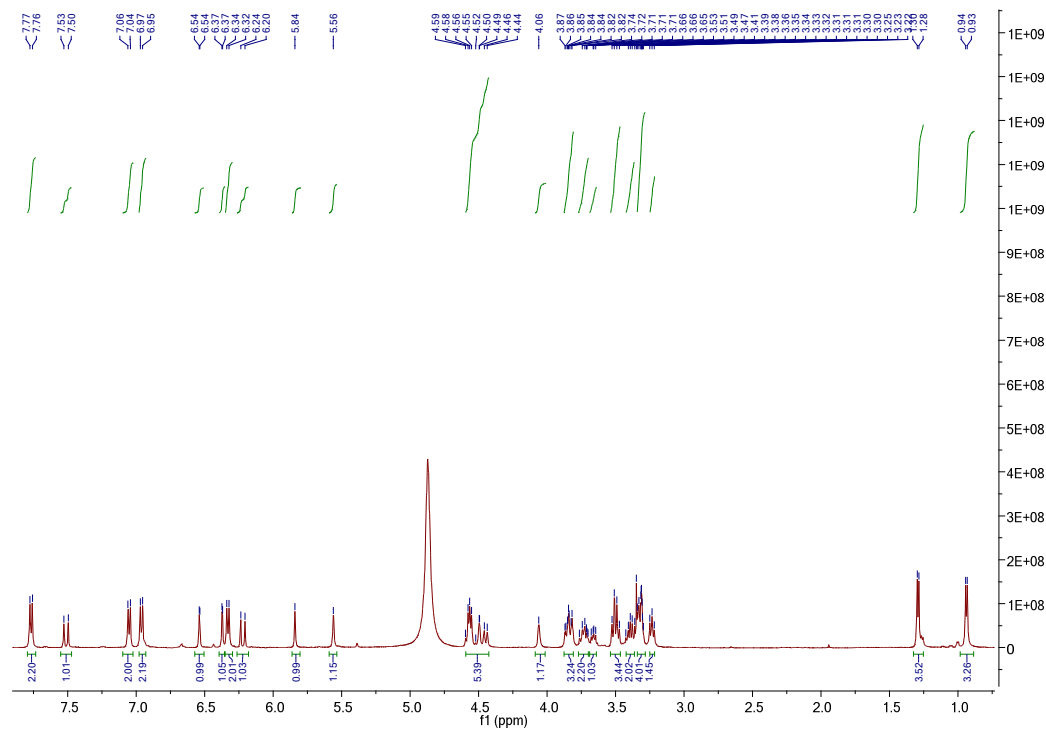

**Figure S17:**  $^1\text{H}$  NMR spectrum of compound **5** (500 MHz, Methanol- $d_4$ ).

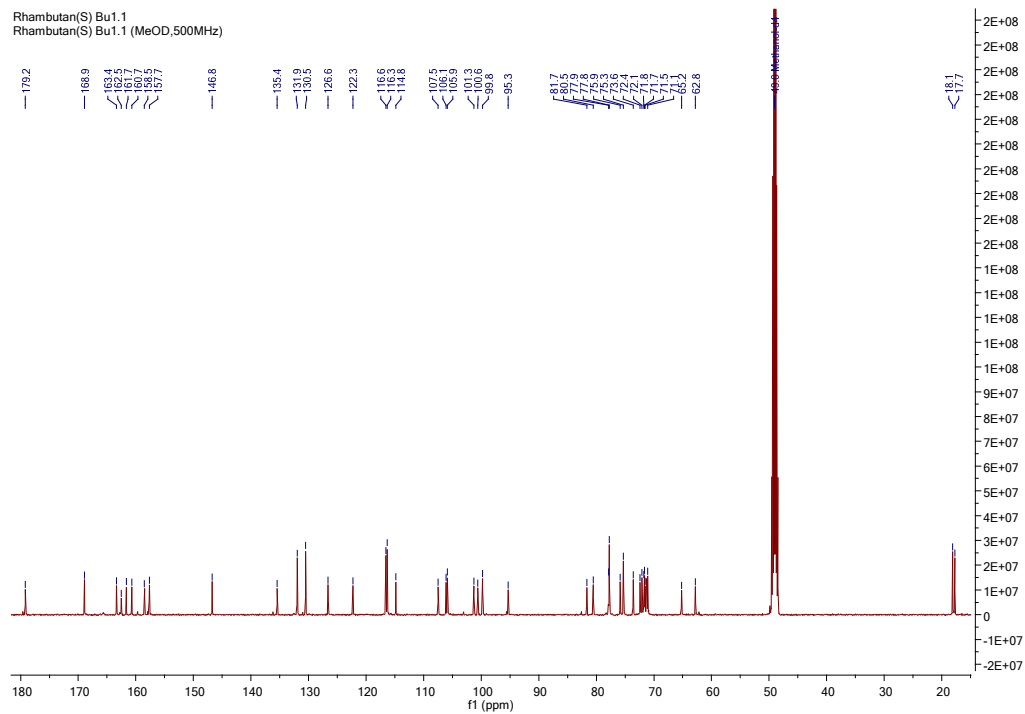

**Figure S18:**  $^{13}\text{C}$  NMR spectrum of compound **5** (125 MHz, Methanol- $d_4$ ).

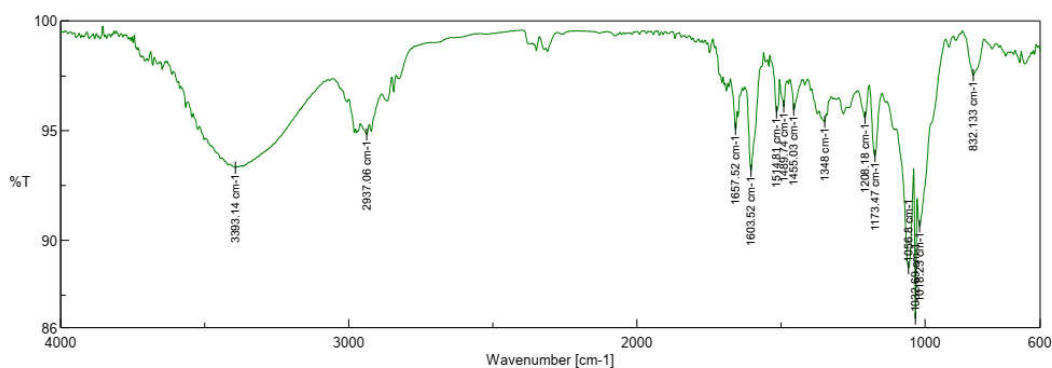

|                    |                    |                           |                 |
|--------------------|--------------------|---------------------------|-----------------|
| [Comment]          |                    | [Measurement Information] |                 |
| Sample Name        | rambutane.Bu1.1    | Model Name                | FT/IR-4200typeA |
| Comment            |                    | Serial Number             | B038361018      |
| User               |                    | Light Source              | Standard        |
| Division           |                    | Detector                  | TGS             |
| Company            | 공통기기실              | Accumulation              | Auto (23)       |
|                    |                    | Resolution                | 4 cm⁻¹          |
|                    |                    | Zero Filling              | On              |
|                    |                    | Apodization               | Cosine          |
|                    |                    | Gain                      | Auto (2)        |
|                    |                    | Aperture                  | Auto (7.1 mm)   |
|                    |                    | Scanning Speed            | Auto (2 mm/sec) |
|                    |                    | Filter                    | Auto (30000 Hz) |
| [Data Information] |                    |                           |                 |
| Creation Date      | 2019-08-24 오후 4:42 |                           |                 |
| Data array type    | Linear data array  |                           |                 |
| Horizontal         | Wavenumber [cm⁻¹]  |                           |                 |
| Vertical           | %T                 |                           |                 |
| Start              | 599.753 cm⁻¹       |                           |                 |
| End                | 4000.6 cm⁻¹        |                           |                 |
| Data pitch         | 0.964233 cm⁻¹      |                           |                 |
| Data points        | 3528               |                           |                 |

Figure S19: IR spectrum of compound 5.

### Peak 5

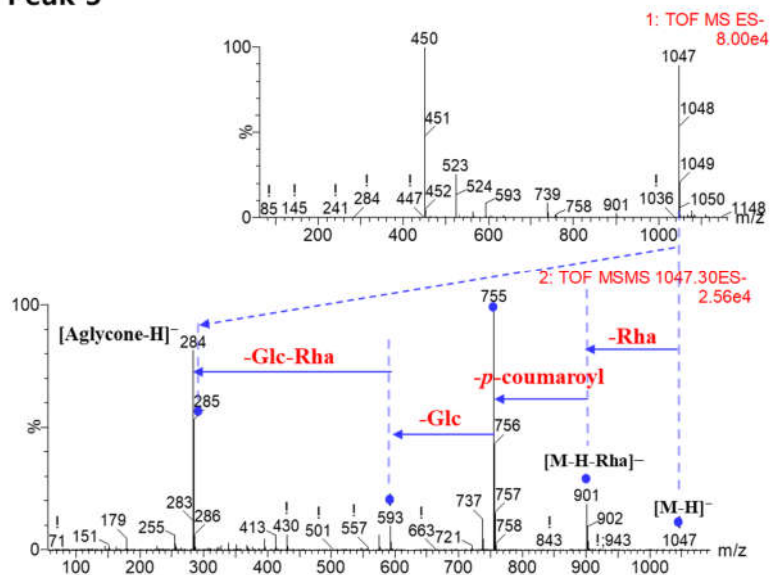

Figure S20: Fragmentation pathway of compound 5.



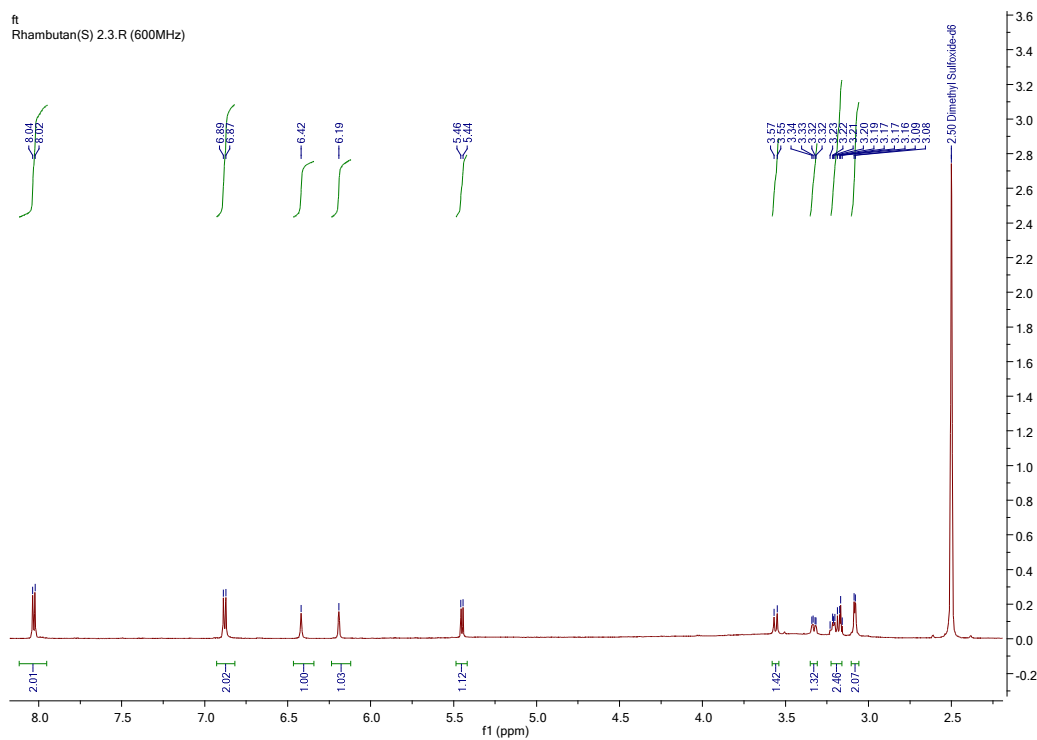

**Figure S21:**  $^1\text{H}$  NMR spectrum of compound **6** (600 MHz,  $\text{DMSO-}d_6$ ).

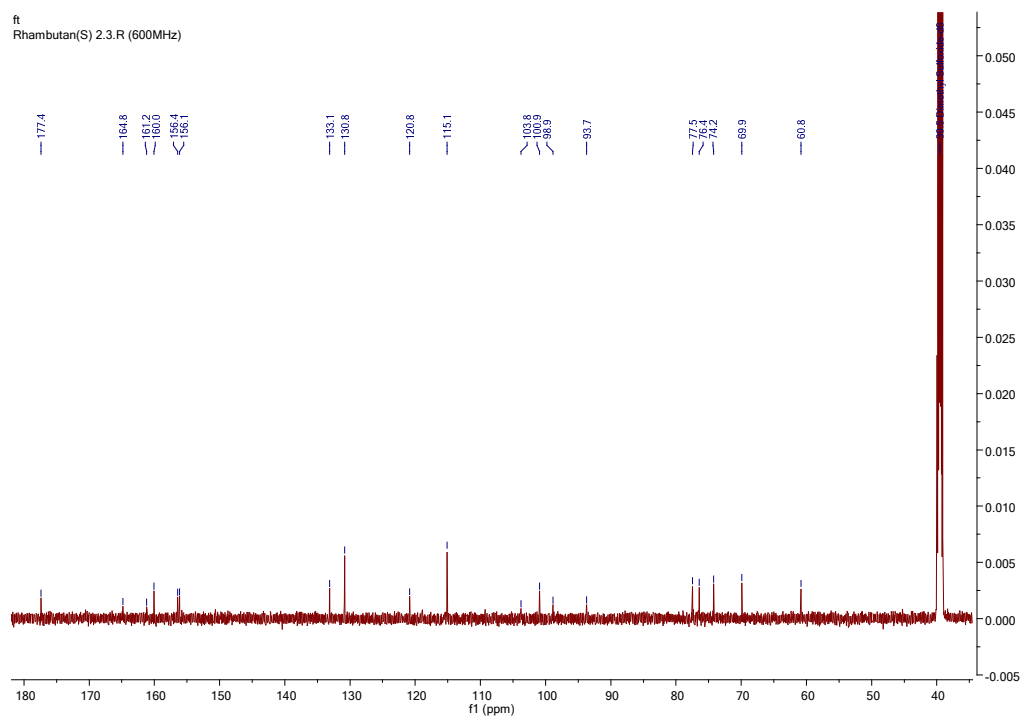

**Figure S22:**  $^{13}\text{C}$  NMR spectrum of compound **6** (150 MHz,  $\text{DMSO-}d_6$ ).

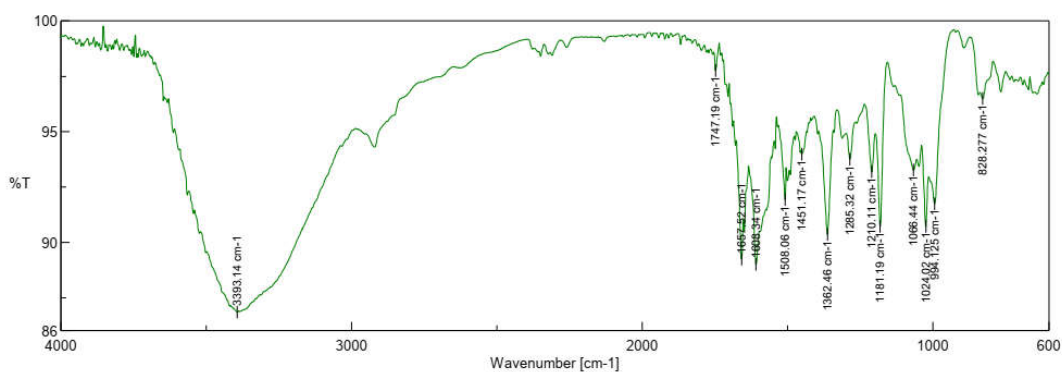

|                    |                    |                           |                 |
|--------------------|--------------------|---------------------------|-----------------|
| [Comment]          |                    | [Measurement Information] |                 |
| Sample Name        | rambutane.Bu3.2.R  | Model Name                | FT/IR-4200typeA |
| Comment            |                    | Serial Number             | B038361018      |
| User               |                    | Light Source              | Standard        |
| Division           | 공통기기실              | Detector                  | TGS             |
| Company            |                    | Accumulation              | Auto (23)       |
|                    |                    | Resolution                | 4 cm-1          |
|                    |                    | Zero Filling              | On              |
| [Data Information] |                    | Apodization               | Cosine          |
| Creation Date      | 2019-08-24 오후 4:34 | Gain                      | Auto (2)        |
| Data array type    | Linear data array  | Aperture                  | Auto (7.1 mm)   |
| Horizontal         | Wavenumber [cm-1]  | Scanning Speed            | Auto (2 mm/sec) |
| Vertical           | %T                 | Filter                    | Auto (30000 Hz) |
| Start              | 599.753 cm-1       |                           |                 |
| End                | 4000.6 cm-1        |                           |                 |
| Data pitch         | 0.964233 cm-1      |                           |                 |
| Data points        | 3528               |                           |                 |

Figure S23: IR spectrum of compound 6.

Peak 6

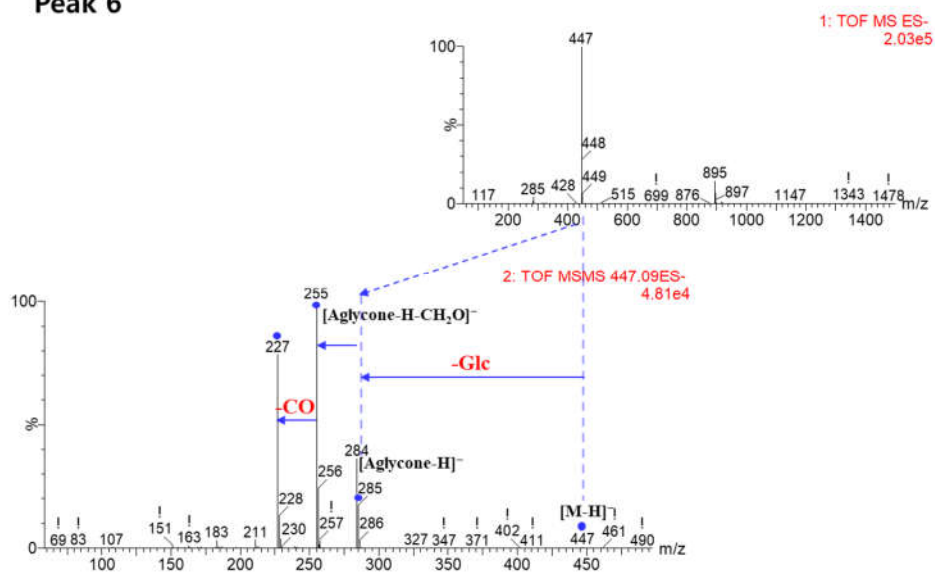

Figure S24: Fragmentation pathway of compound 6.

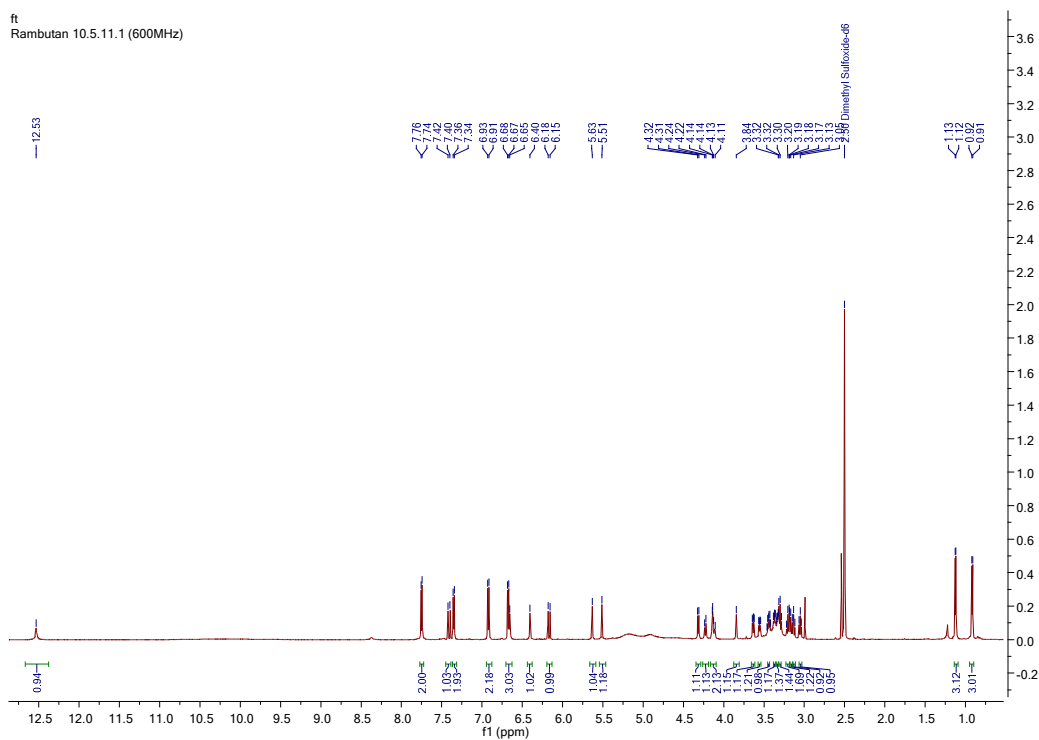

Figure S25:  $^1\text{H}$  NMR spectrum of compound 7 (600 MHz,  $\text{DMSO-}d_6$ ).

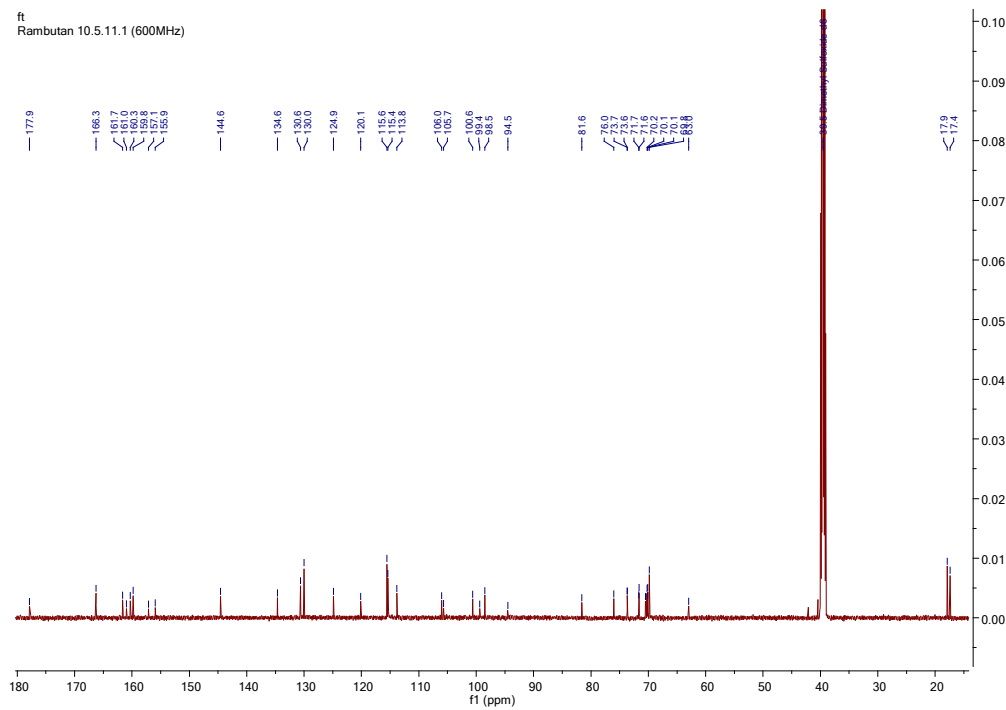

Figure S26:  $^{13}\text{C}$  NMR spectrum of compound 7 (150 MHz,  $\text{DMSO-}d_6$ ).

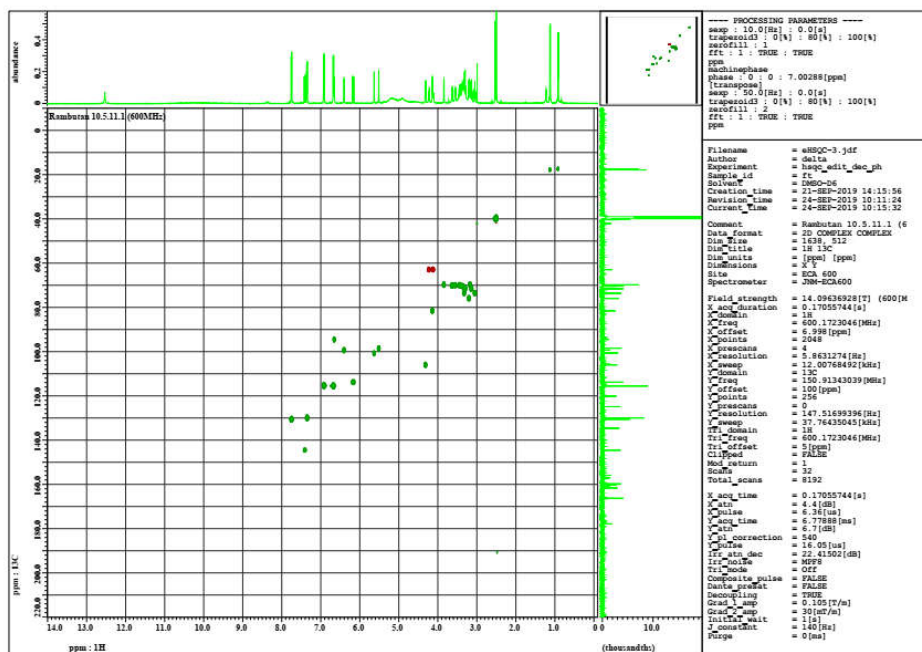

Figure S27: HSQC NMR spectrum of compound 7 (600 MHz, DMSO- $d_6$ ).

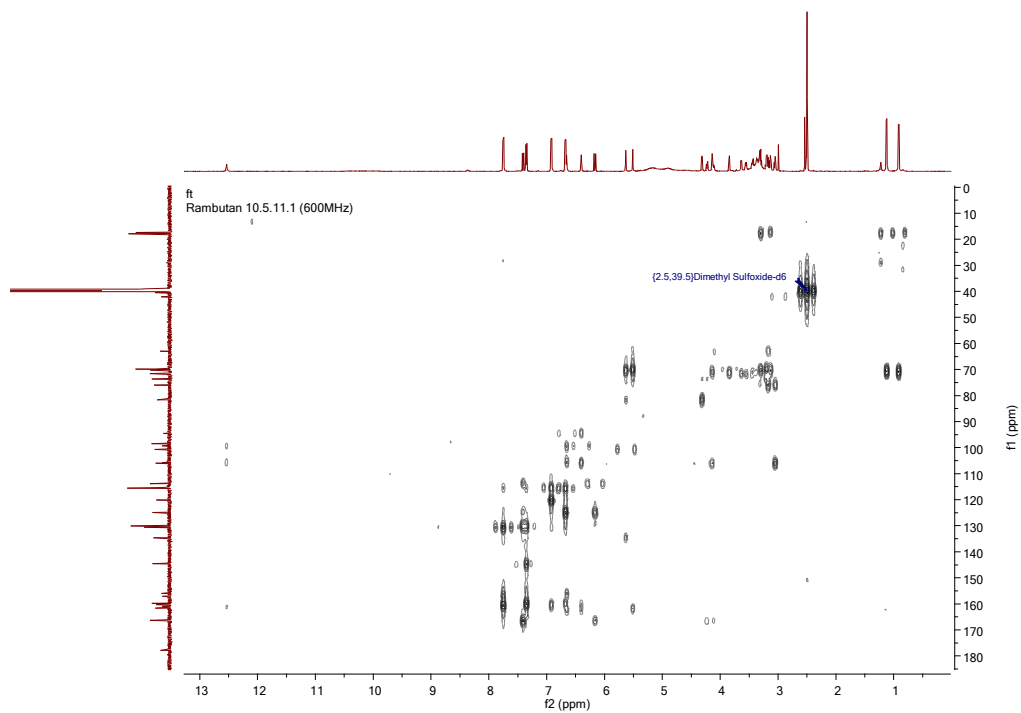

Figure S28: HMBC NMR spectrum of compound 7 (600 MHz, DMSO- $d_6$ ).

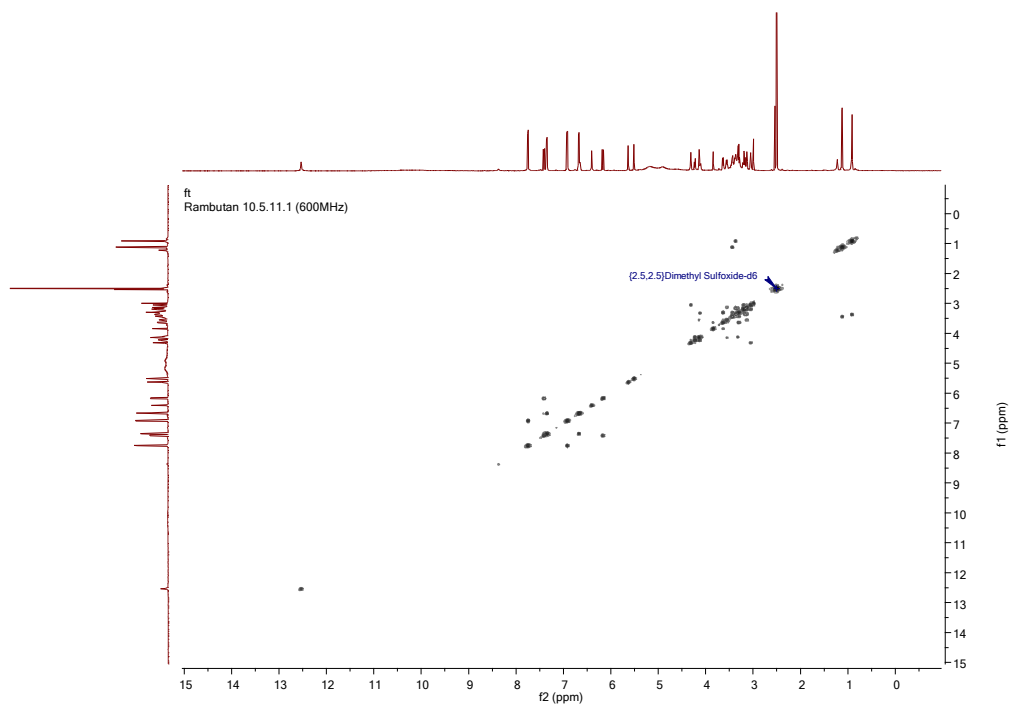

Figure S29:  $^1\text{H}$ - $^1\text{H}$  COSY NMR spectrum of compound 7 (600 MHz,  $\text{DMSO}-d_6$ ).

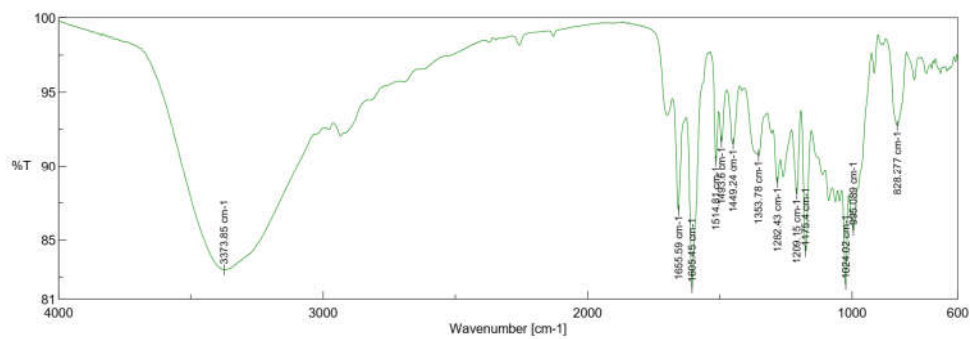

|                    |                    |                           |                 |
|--------------------|--------------------|---------------------------|-----------------|
| [Comment]          |                    | [Measurement Information] |                 |
| Sample Name        | Rabu_compound7_new | Model Name                | FT/IR-4200typeA |
| Comment            |                    | Serial Number             | B038361018      |
| User               |                    | Light Source              | Standard        |
| Division           |                    | Detector                  | TGS             |
| Company            | 공동기기술              | Accumulation              | Auto (22)       |
|                    |                    | Resolution                | 4 cm-1          |
| [Data Information] |                    | Zero Filling              | On              |
| Creation Date      | 2019-09-19 오후 8:30 | Apodization               | Cosine          |
| Data array type    | Linear data array  | Gain                      | Auto (2)        |
| Horizontal         | Wavenumber [cm-1]  | Aperture                  | Auto (7.1 mm)   |
| Vertical           | %T                 | Scanning Speed            | Auto (2 mm/sec) |
| Start              | 599.753 cm-1       | Filter                    | Auto (30000 Hz) |
| End                | 4000.6 cm-1        |                           |                 |
| Data pitch         | 0.964233 cm-1      |                           |                 |
| Data points        | 3528               |                           |                 |

Figure S30: IR spectrum of compound 7.

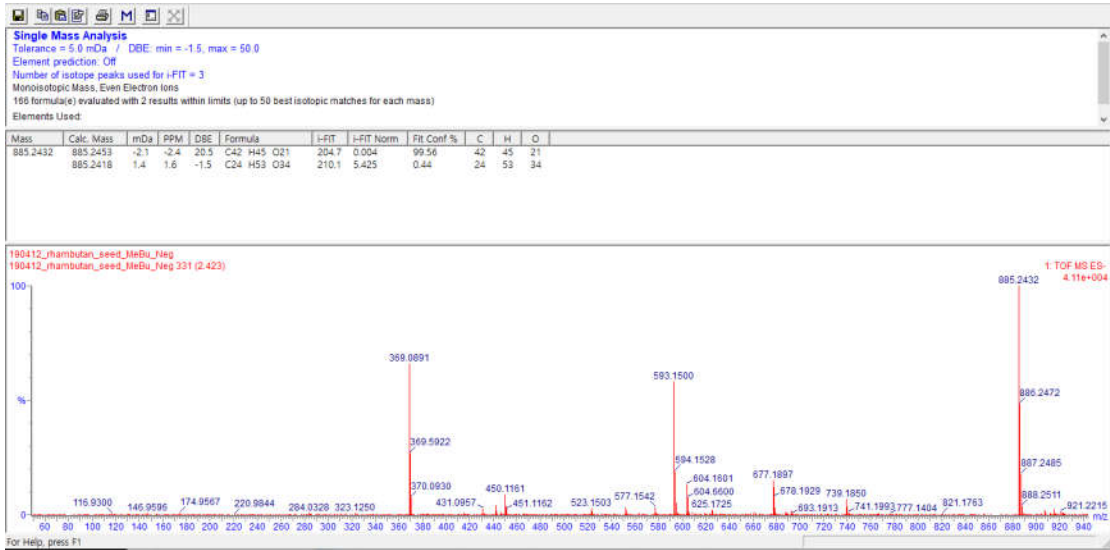

**Figure S31:** HRESIMS spectrum of compound 7.

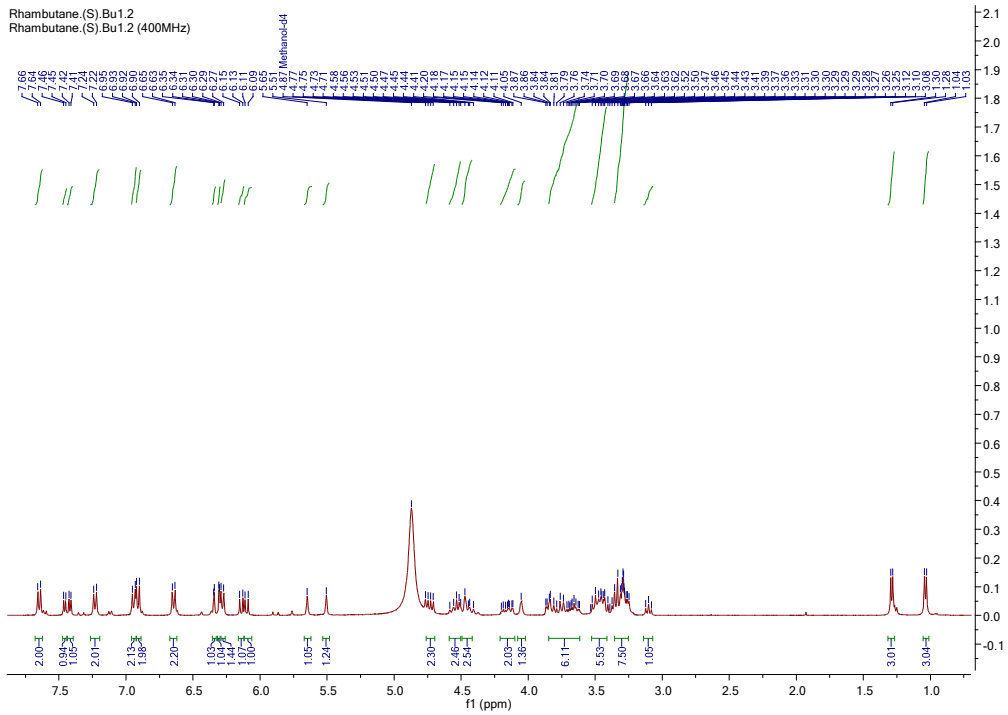

Figure S32:  $^1\text{H}$  NMR spectrum of compound **8** (400 MHz, Methanol- $d_4$ ).

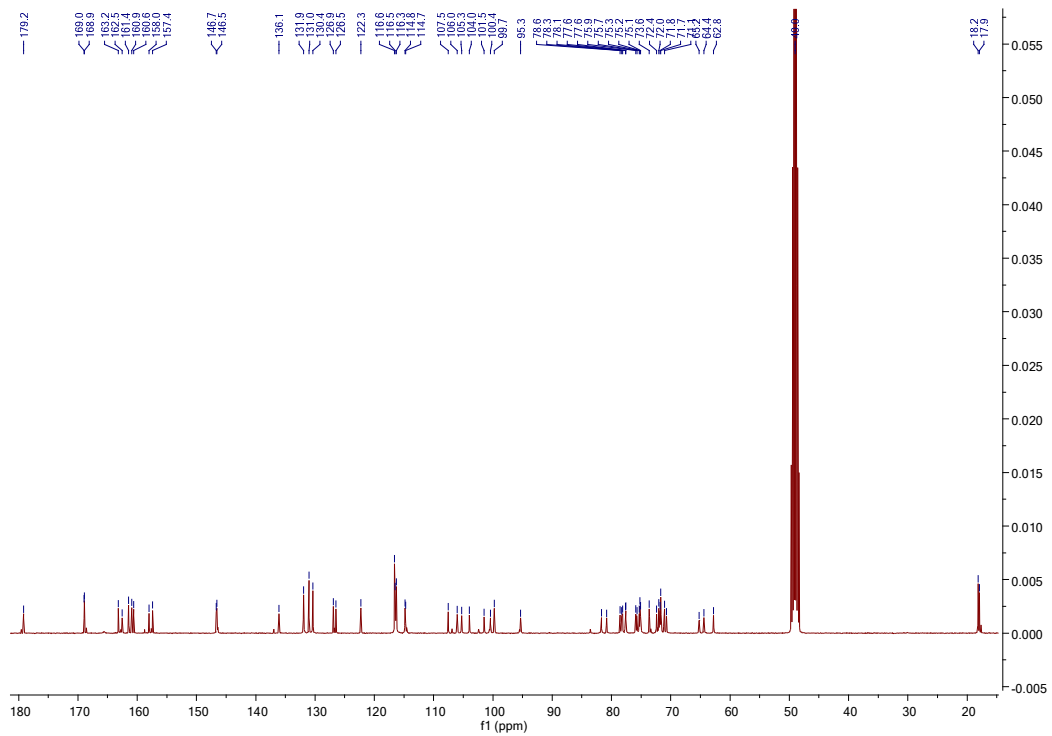

Figure S33:  $^{13}\text{C}$  NMR spectrum of compound **8** (100 MHz, Methanol- $d_4$ ).

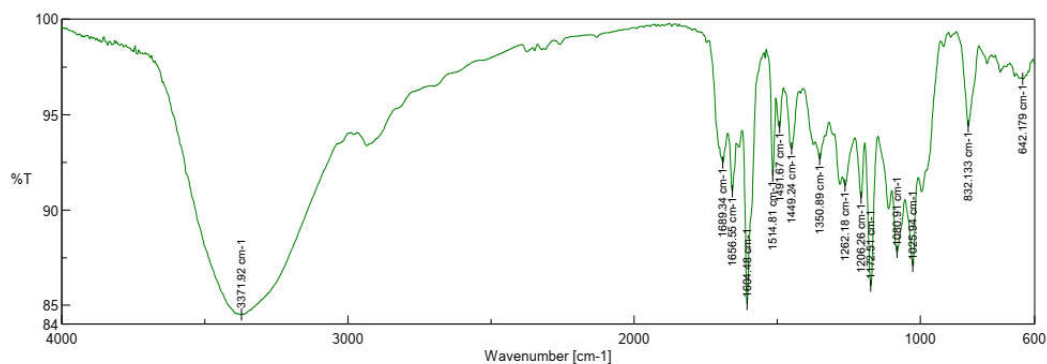

|                    |                    |                           |                 |
|--------------------|--------------------|---------------------------|-----------------|
| [Comment]          |                    | [Measurement Information] |                 |
| Sample Name        | rambutane.Bu1.2    | Model Name                | FT/IR-4200typeA |
| Comment            |                    | Serial Number             | B038361018      |
| User               |                    | Light Source              | Standard        |
| Division           |                    | Detector                  | TGS             |
| Company            | 공통기기실              | Accumulation              | Auto (23)       |
|                    |                    | Resolution                | 4 cm-1          |
|                    |                    | Zero Filling              | On              |
|                    |                    | Apodization               | Cosine          |
|                    |                    | Gain                      | Auto (2)        |
|                    |                    | Aperture                  | Auto (7.1 mm)   |
|                    |                    | Scanning Speed            | Auto (2 mm/sec) |
|                    |                    | Filter                    | Auto (30000 Hz) |
| [Data Information] |                    |                           |                 |
| Creation Date      | 2019-08-24 오후 4:23 |                           |                 |
| Data array type    | Linear data array  |                           |                 |
| Horizontal         | Wavenumber [cm-1]  |                           |                 |
| Vertical           | %T                 |                           |                 |
| Start              | 599.753 cm-1       |                           |                 |
| End                | 4000.6 cm-1        |                           |                 |
| Data pitch         | 0.964233 cm-1      |                           |                 |
| Data points        | 3528               |                           |                 |

Figure S34: IR spectrum of compound 8.

### Peak 8

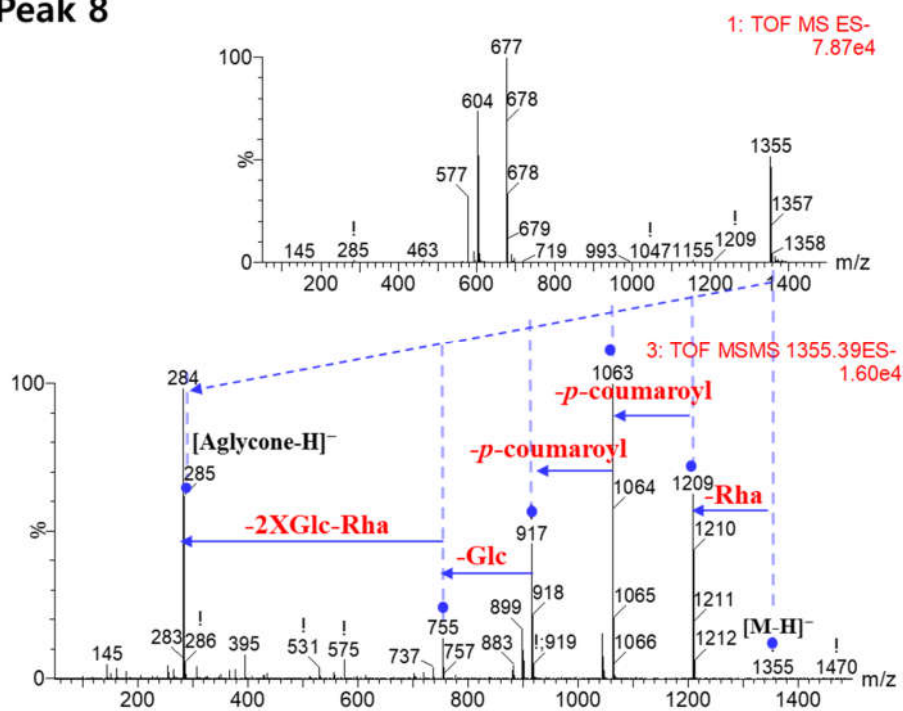

Figure S35: Fragmentation pathway of compound 8.



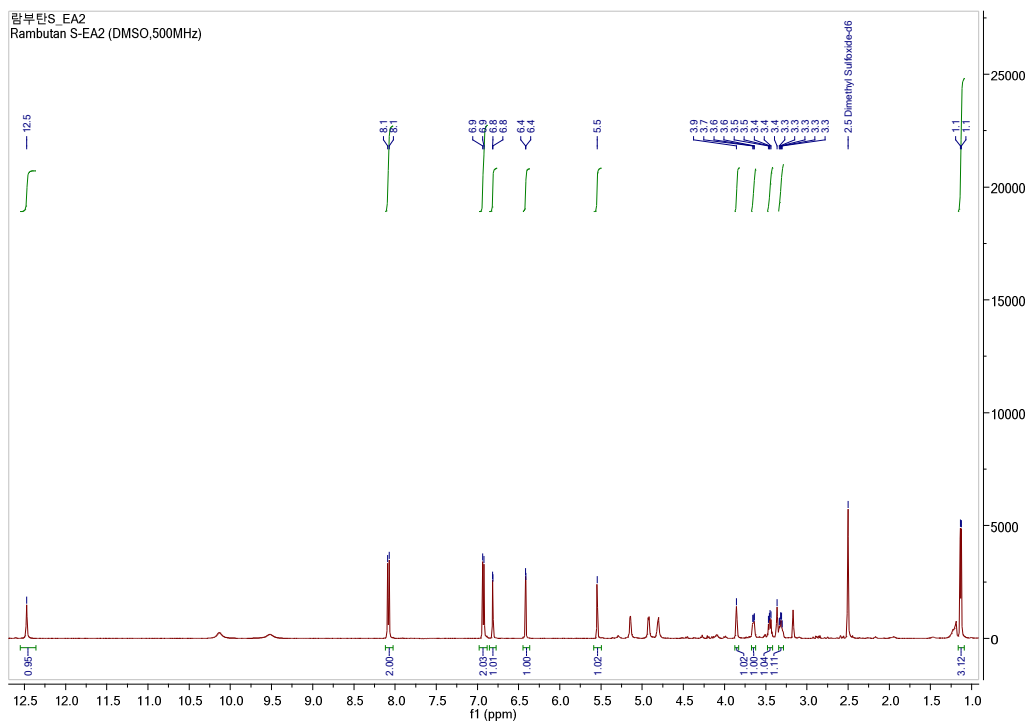

**Figure S36:**  $^1\text{H}$  NMR spectrum of compound **9** (500 MHz,  $\text{DMSO-}d_6$ ).

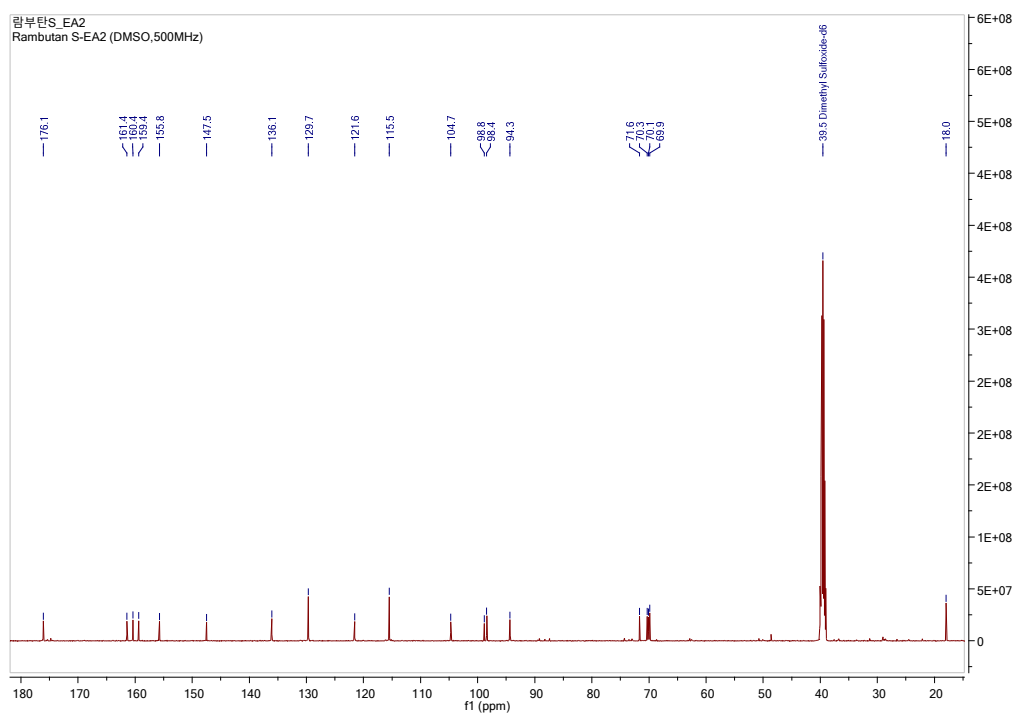

**Figure S37:**  $^{13}\text{C}$  NMR spectrum of compound **9** (125 MHz,  $\text{DMSO-}d_6$ ).

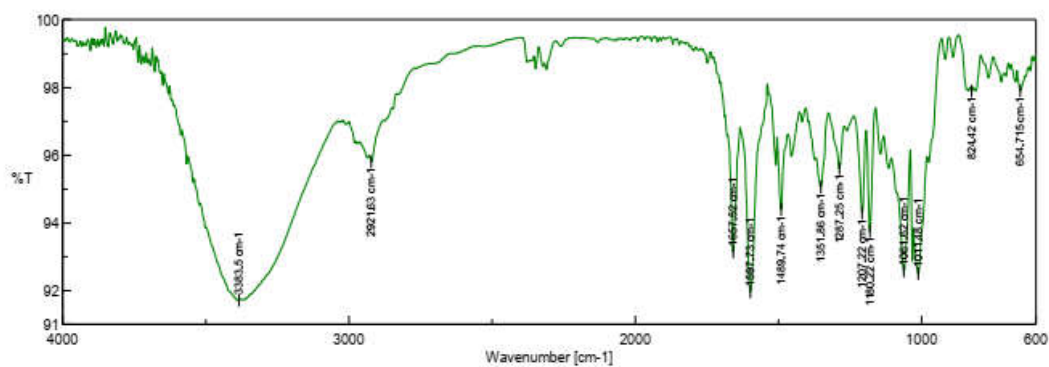

|                    |                    |                           |                 |
|--------------------|--------------------|---------------------------|-----------------|
| [Comment]          |                    | [Measurement Information] |                 |
| Sample Name        | rambutane.EA1      | Model Name                | FT/IR-4200typeA |
| Comment            |                    | Serial Number             | B038361018      |
| User               |                    | Light Source              | Standard        |
| Division           | 공통기기실              | Detector                  | TGS             |
| Company            |                    | Accumulation              | Auto (23)       |
|                    |                    | Resolution                | 4 cm⁻¹          |
|                    |                    | Zero Filling              | On              |
|                    |                    | Apodization               | Cosine          |
|                    |                    | Gain                      | Auto (2)        |
|                    |                    | Aperture                  | Auto (7.1 mm)   |
|                    |                    | Scanning Speed            | Auto (2 mm/sec) |
|                    |                    | Filter                    | Auto (30000 Hz) |
| [Data Information] |                    |                           |                 |
| Creation Date      | 2019-08-24 오후 4:45 |                           |                 |
| Data array type    | Linear data array  |                           |                 |
| Horizontal         | Wavenumber [cm⁻¹]  |                           |                 |
| Vertical           | %T                 |                           |                 |
| Start              | 599.753 cm⁻¹       |                           |                 |
| End                | 4000.6 cm⁻¹        |                           |                 |
| Data pitch         | 0.964233 cm⁻¹      |                           |                 |
| Data points        | 3528               |                           |                 |

Figure S38: IR spectrum of compound 9.

### Peak 9

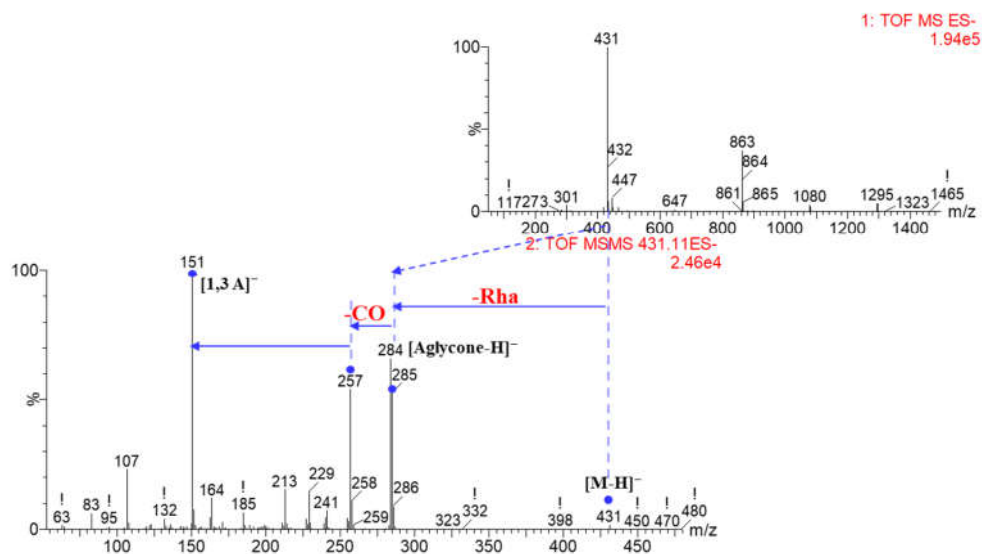

Figure S39: Fragmentation pathway of compound 9.

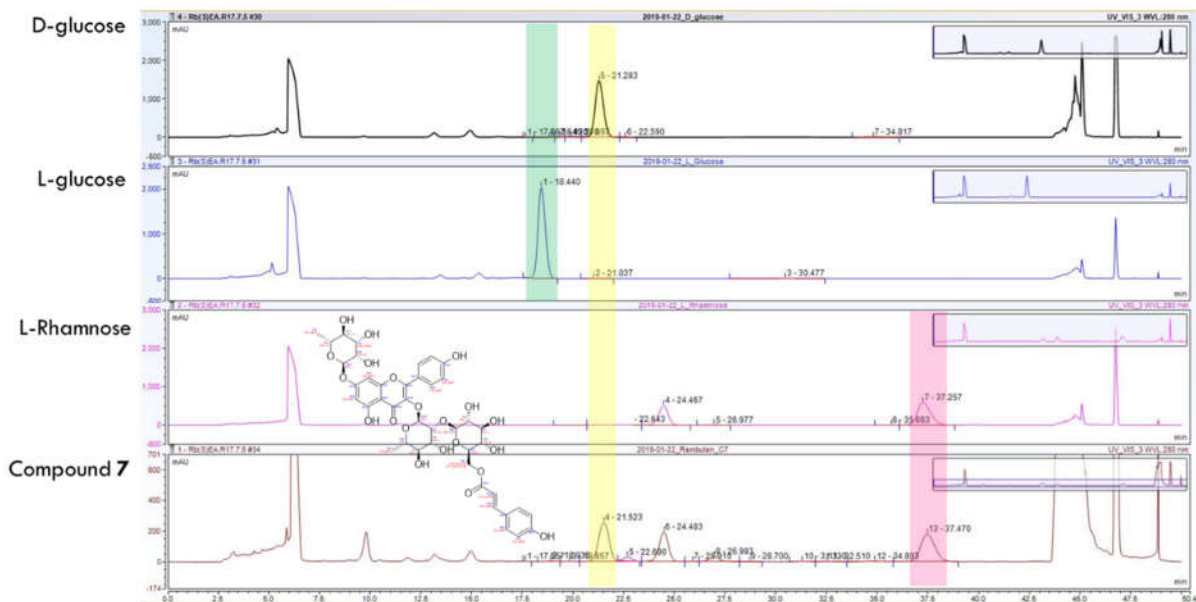

**Figure S40:** Sugar Analysis. Compound **7** (2.5 mg) was heated in 0.1 mL at 110°C for 1.5 h of 2 M HCl. After acid hydrolysed sample was neutralized with Na<sub>2</sub>CO<sub>3</sub> and dried. The residue was derivatized with L-cysteine methyl ester hydrochloride in anhydrous pyridine (200 μL, 60 °C, 1 h) and subsequently added phenylisothiocyanate (1 μL, 60 °C, 1 h). The sugar derivatives from compound **7** were compared with standard sugar derivatives by the HPLC analysis and were confirm the absolute configuration of these sugars to be D-glucose, and L-rhamnose.

## Figure S41: Molecular Networking

HRESIMS / MS data of the bioactive fractions of *N. lappaceum* seed and extracts of each part of *N. lappaceum* (pulp, peel, seed) were performed by Xevo G2 QTOF mass spectrometer with a Waters Acquity UHPLC<sup>®</sup> BEH C18 (100 mm × 2.1 mm, 1.7 μm) column. Those data generated molecular networking job with HRESIMS/MS spectra and analyzed in comparison with several reference papers and advanced library searches of GNPS. Before creating molecular networking, MS / MS data were preprocessed using the MZmine 2 program to increase reliability and then uploaded on the GNPS platform (<https://gnps.ucsd.edu>) to create molecular networking. The parameters for the generation of the molecular network were set as follows: the precursor ion mass tolerance of 0.02 Da, Fragment ion mass tolerance of 0.02 Da, a cosine score above 0.65, minimum matched fragment ions below 4 counts were removed from the MS/MS spectra. The Matching with the publicly accessible GNPS spectral library was performed with a score threshold of 0.65 and matched fragment ion number above 4. After that, the GNPS data were visualized using Cytoscape 3.7.1. The completed molecular network of *N. lappaceum* active fractions is explored and downloaded from the GNPS website via the following link.: <https://gnps.ucsd.edu/ProteoSAFe/status.jsp?task=301c3a87d4594d648031a1399c2c3ff7>. The completed molecular network of *N. lappaceum* pulp, peel, seed extract is explored and downloaded from the GNPS website via the following link: <https://gnps.ucsd.edu/ProteoSAFe/status.jsp?task=9b427c2e16304de89f32167f679612f1>.

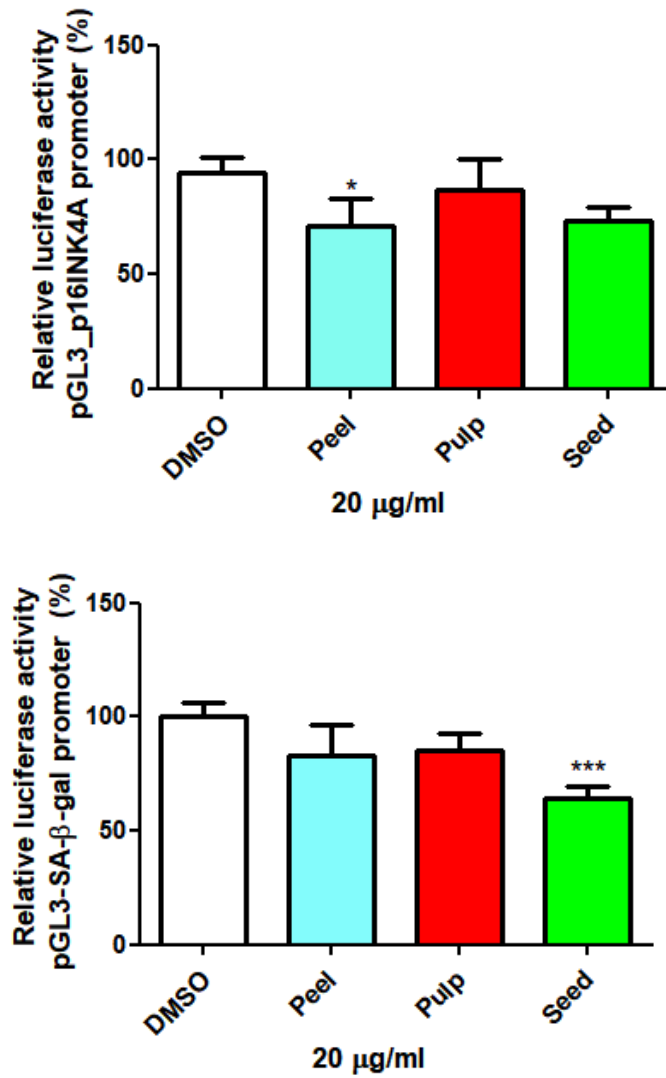

**Figure S42:** Effect of *N. lappaceum* peel, pulp and seed on p16Ink4A and SA-β-gal promoter activity in human dermal fibroblasts.

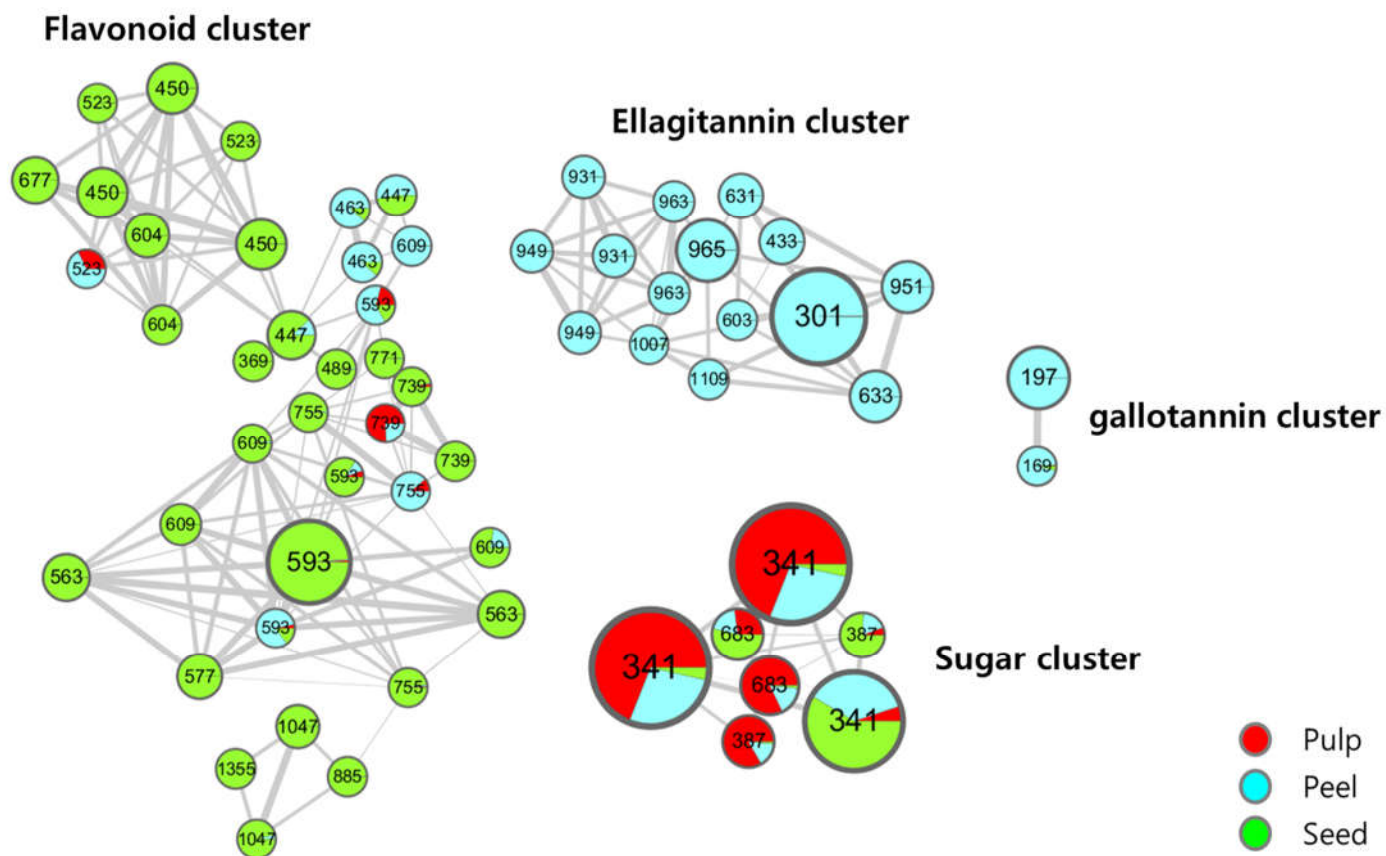

**Figure S43:** Annotation of the molecular networking of the crude extract from *N. lappaceum* pulp (red nodes), peel (Aquamarine nodes), seed (green nodes) which shows flavonoid, ellagitannin, gallotannin and sugar.

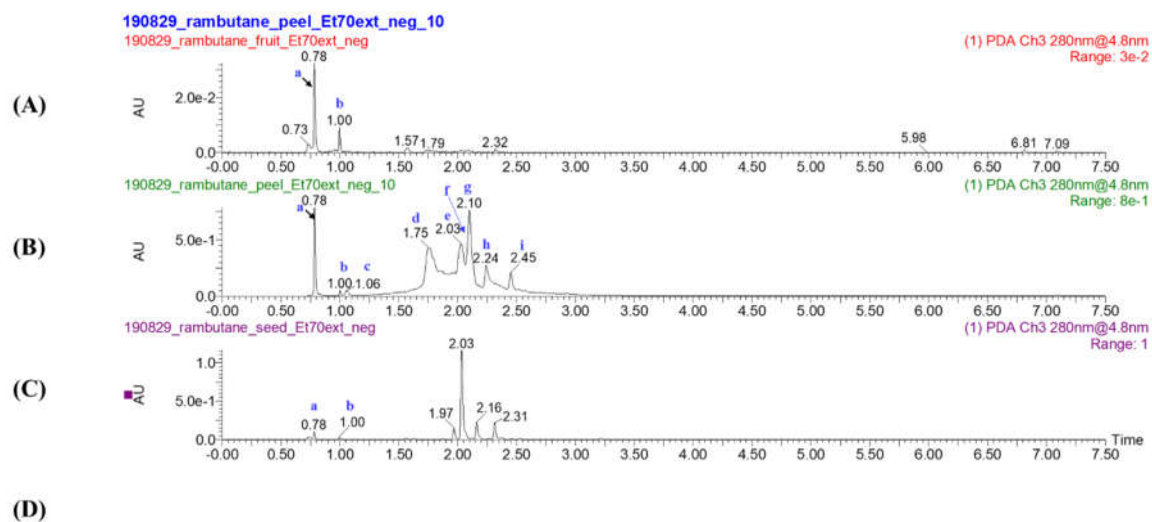

| Peak | $t_R$ (mins) | Compounds              | Formula<br>[M-H] <sup>-</sup>                   | [M-H] <sup>-</sup> |            | MS/MS fragments    | Error<br>(ppm) | Group        | References                                                                           |
|------|--------------|------------------------|-------------------------------------------------|--------------------|------------|--------------------|----------------|--------------|--------------------------------------------------------------------------------------|
|      |              |                        |                                                 | Observed           | Calculated |                    |                |              |                                                                                      |
| a    | 0.79         | Disaccharides          | C <sub>12</sub> H <sub>22</sub> O <sub>11</sub> | 341.1092           | 341.1084   | 179,161            | 2.3            | Sugar        | (Verardo et al., 2009)<br>(Gabbani et al., 2010)                                     |
| b    | 0.99         | Disaccharides          | C <sub>12</sub> H <sub>22</sub> O <sub>11</sub> | 341.1087           | 341.1084   | 179,161            | 0.9            | Sugar        | (Verardo et al., 2009)<br>(Gabbani et al., 2010)                                     |
| c    | 1.06         | Galic acid             | C <sub>7</sub> H <sub>5</sub> O <sub>5</sub>    | 169.0143           | 169.0137   | 125                | 3.5            | Gallotannins | (Yisimayili et al., 2019)<br>(Sun et al., 2014)<br>(Mena et al., 2012)               |
| d    | 1.75         | Conlagin               | C <sub>27</sub> H <sub>21</sub> O <sub>18</sub> | 633.0724           | 633.0728   | 463, 301, 279, 169 | -0.6           | Ellagitannin | (Yisimayili et al., 2019)<br>(Hernández et al., 2017)<br>(Thitlerdecha et al., 2010) |
| e    | 2.03         | Geraniin               | C <sub>41</sub> H <sub>27</sub> O <sub>27</sub> | 951.0709           | 951.0740   | 933, 301, 169      | -3.3           | Ellagitannin | (Hernández et al., 2017)<br>(Thitlerdecha et al., 2010)                              |
| f    | 2.05         | Ellagic acid pentoside | C <sub>19</sub> H <sub>13</sub> O <sub>12</sub> | 433.0406           | 433.0407   | 301, 169           | -0.2           | Ellagitannin | (Hernández et al., 2017)                                                             |
| g    | 2.10         | Rhoipteleannina H      | C <sub>12</sub> H <sub>29</sub> O <sub>27</sub> | 965.0887           | 965.0896   | 301, 247, 169      | -0.9           | Ellagitannin | (Jiang et al., 1999)<br>(Quiñela et al., 2017)                                       |
| h    | 2.24         | Ellagic acid           | C <sub>14</sub> H <sub>5</sub> O <sub>6</sub>   | 300.9998           | 300.9984   | 257, 229, 185      | 4.7            | Ellagitannin | (Yisimayili et al., 2019)<br>(Mena et al., 2012)<br>(Hernández et al., 2017)         |
| i    | 2.45         | ethyl gallate          | C <sub>9</sub> H <sub>9</sub> O <sub>5</sub>    | 197.0445           | 197.0450   | 169, 124           | -2.5           | gallotannins | (Thitlerdecha et al., 2010)<br>(Zhang et al., 2017)<br>(Mahmood et al., 2018)        |

**Figure S44:** DAD chromatograms of crude extract of *N. lappaceum* pulp (A), peel (B), and seed (C) at 280 nm. (D) major compounds of pulp, peel and seed extracts of *N. lappaceum* identified in corresponding MS / MS fragmentation profiles.

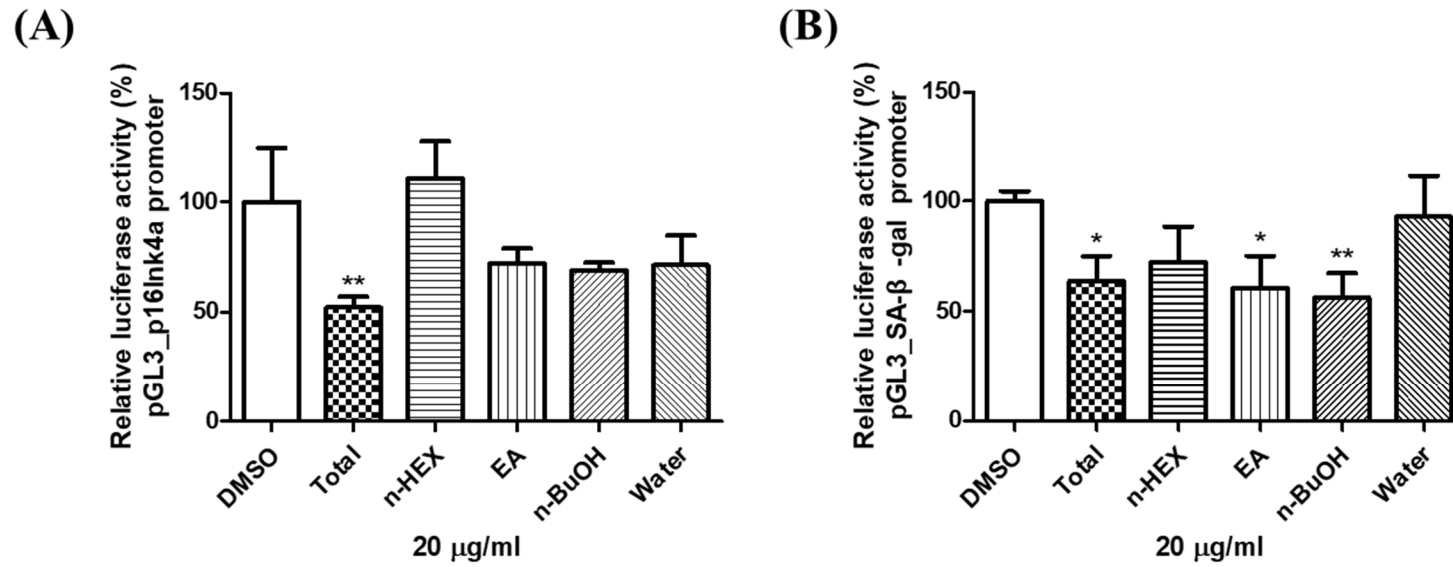

**Figure S45.** Effect of crude extract and four fractions from *N. lappaceum* seeds on p16INK4A and SA- $\beta$ -gal transcription in human dermal fibroblasts. Human dermal fibroblasts were transiently co-transfected with pGL3-p16ink4a (**A**) or pGL3-glb1 (**B**) promoter with  $\beta$ -galactosidase as a transfection control.



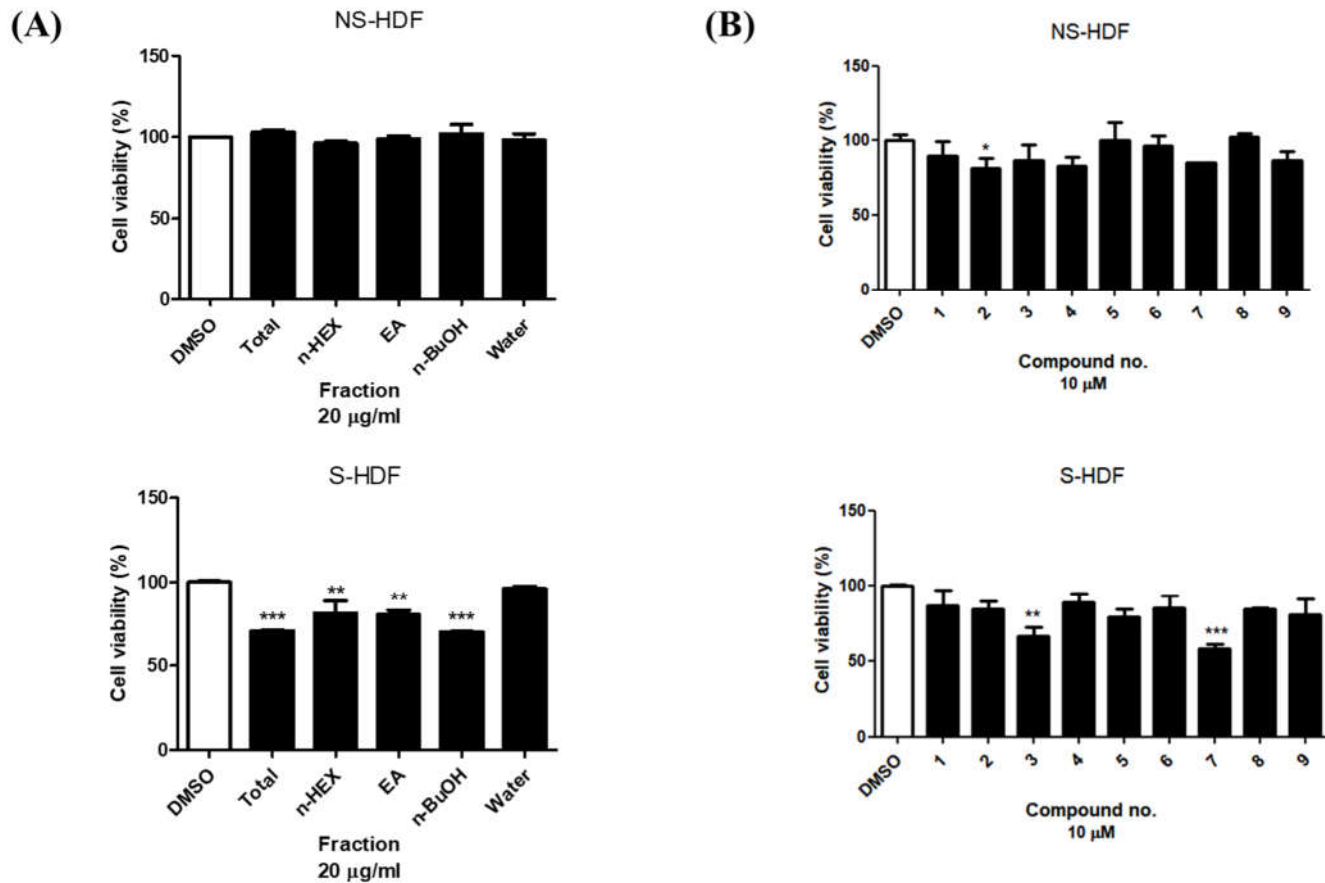

**Figure S46:** The cytotoxicity effect of total extract and four fractions 20  $\mu\text{g}/\text{mL}$  (A) and 10  $\mu\text{M}$  compounds 1-9 obtained from *N. lappaceum* seeds (B) both in young and senescent HDFs. After 72 h of incubation with tested fractions and compounds, the MTT assay was carried out as described in the experimental section.

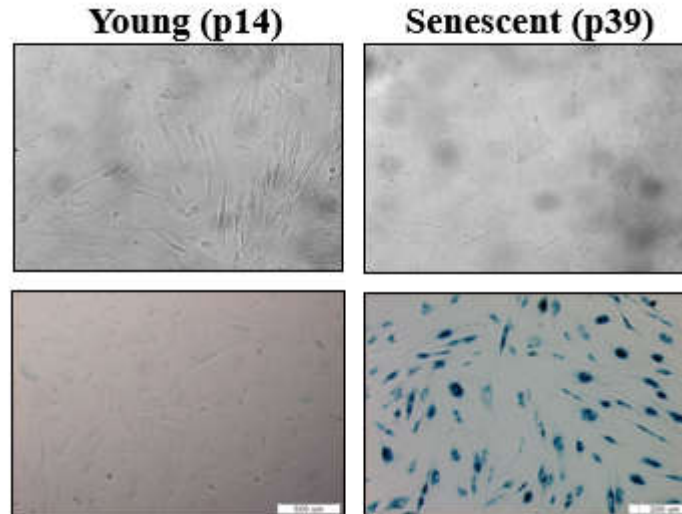

**Figure S47:** Senescence-associated  $\beta$ -galactosidase staining of HDFs. Young and aged HDFs stained for 24h for SA- $\beta$  galactosidase. Images of young HDFs (passage 14) had little staining, while aged HDFs (passage 39) stained blue.

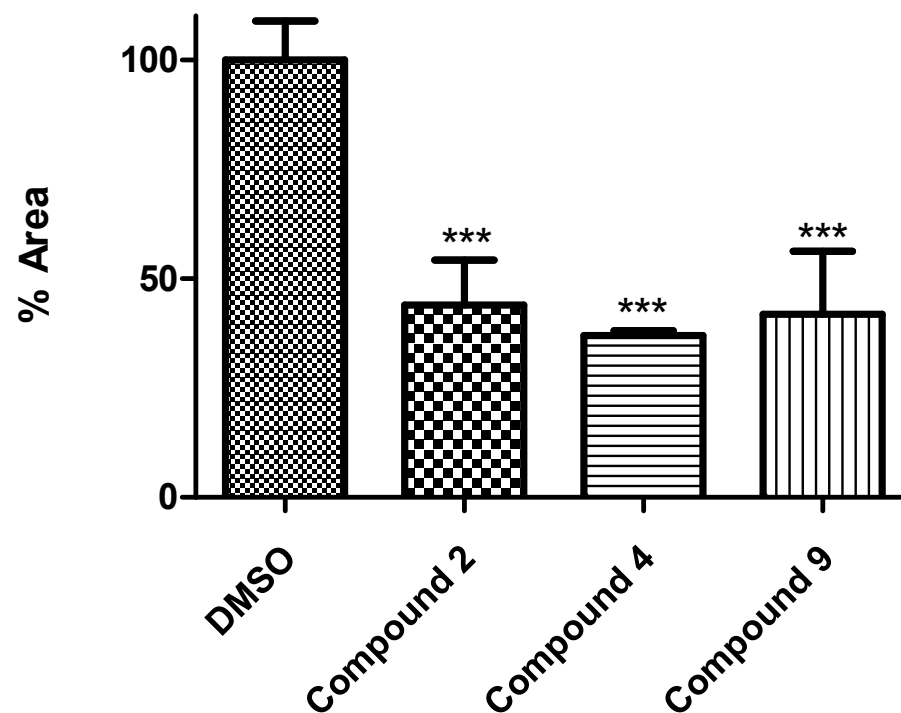

**Figure S48:** Quantification of senescence-associated  $\beta$ -galactosidase staining. Aged HDF cells were treated three times over 6 days with vehicle or 10  $\mu$ M compounds 2, 4, and 9 and quantified through images obtained from a fluorescence microscope. Data were calculated by the mean  $\pm$ SD of three independent experiments. Significant differences between the groups were determined using one-way analysis of variance (ANOVA) with the Tukey method. Statistical significance was accepted at \*  $p < 0.05$ , \*\*  $p < 0.01$ , and \*\*\*  $p < 0.001$ .

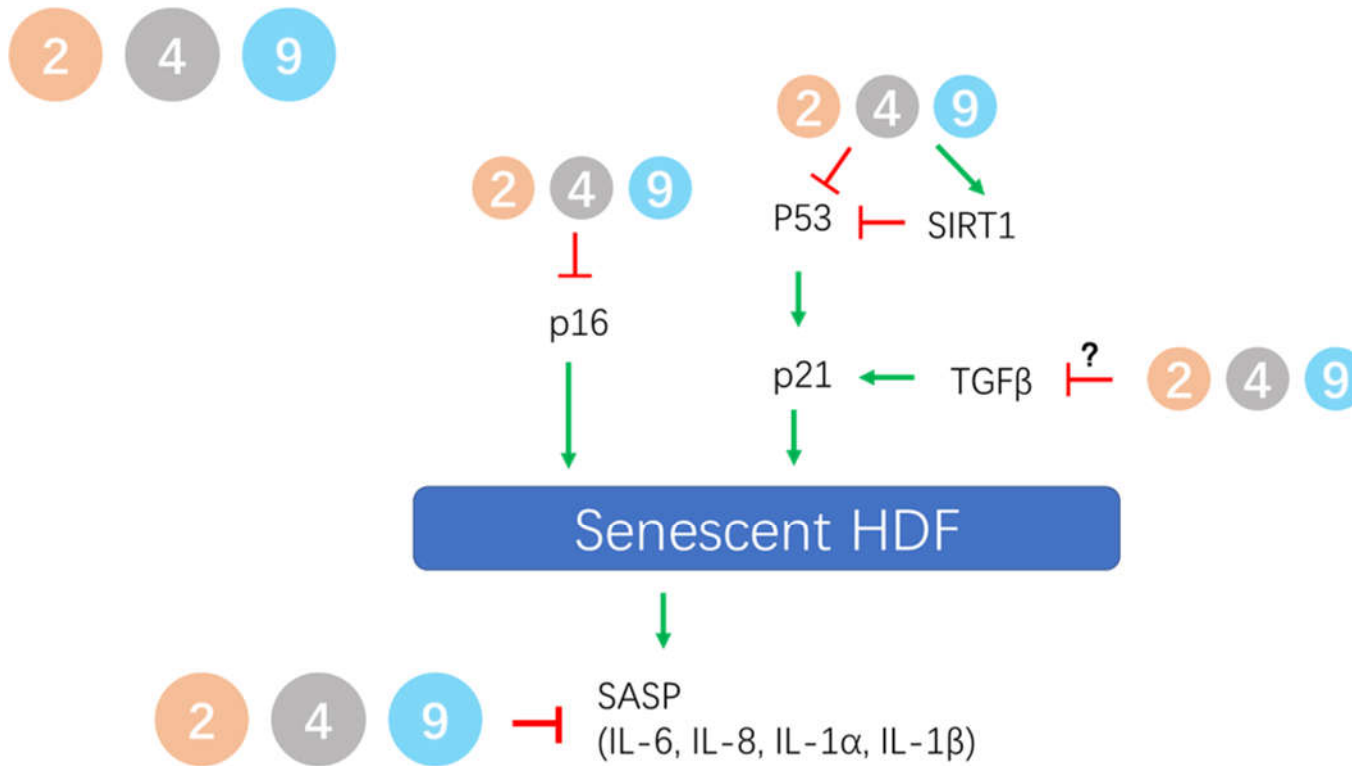

**Figure S49:** Mechanism of action of compounds 2, 4, and 9 isolated from Rambutan.

**Table S1.** <sup>1</sup>H NMR data for compounds **1–6, 8 and 9**.

| position    | <b>1<sup>a</sup></b>                         | <b>2<sup>b</sup></b>                         | <b>3<sup>a</sup></b>                         | <b>4<sup>c</sup></b>                         | <b>5<sup>d</sup></b>                         | <b>6<sup>a</sup></b>                         | <b>8<sup>c</sup></b>                         | <b>9<sup>b</sup></b>                         |
|-------------|----------------------------------------------|----------------------------------------------|----------------------------------------------|----------------------------------------------|----------------------------------------------|----------------------------------------------|----------------------------------------------|----------------------------------------------|
|             | $\delta_{\text{H}}$ , mult ( <i>J</i> in Hz) | $\delta_{\text{H}}$ , mult ( <i>J</i> in Hz) | $\delta_{\text{H}}$ , mult ( <i>J</i> in Hz) | $\delta_{\text{H}}$ , mult ( <i>J</i> in Hz) | $\delta_{\text{H}}$ , mult ( <i>J</i> in Hz) | $\delta_{\text{H}}$ , mult ( <i>J</i> in Hz) | $\delta_{\text{H}}$ , mult ( <i>J</i> in Hz) | $\delta_{\text{H}}$ , mult ( <i>J</i> in Hz) |
| <b>6</b>    | 6.44, s                                      | 6.44, d (1.7)                                | 6.45, s                                      | 6.21, s                                      | 6.37, d (1.8)                                | 6.19, br s                                   | 6.31, d (2.0)                                | 6.82, d (2.0)                                |
| <b>8</b>    | 6.82, s                                      | 6.83, d, (1.7)                               | 6.83, s                                      | 6.40, s                                      | 6.54, d (1.8)                                | 6.42, br s                                   | 6.35, d (2.0)                                | 6.42, d (2.0)                                |
| <b>2'</b>   | 8.11, d (8.8)                                | 8.07, d (8.8)                                | 8.12, d (8.8)                                | 8.05, d (7.7)                                | 7.77, br d (8.7)                             | 8.03, d (8.7)                                | 7.64, d (8.7)                                | 8.09, d (8.9)                                |
| <b>3'</b>   | 6.87, d (8.8)                                | 6.88, d (8.8)                                | 6.89, d (8.8)                                | 6.89, d (7.7)                                | 6.95, br d (8.7)                             | 6.88, d (8.7)                                | 6.90, d (8.7)                                | 6.94, d 8.9)                                 |
| <b>5'</b>   | 6.87, d (8.8)                                | 6.88, d (8.8)                                | 6.89, d (8.8)                                | 6.89, d (7.7)                                | 6.95, br d (8.7)                             | 6.88, d (8.7)                                | 6.90, d (8.7)                                | 6.94, d 8.9)                                 |
| <b>6'</b>   | 8.11, d (8.8)                                | 8.07, d (8.8)                                | 8.12, d (8.8)                                | 8.05, d (7.7)                                | 7.77, br d (8.7)                             | 8.03, d (8.7)                                | 7.64, d (8.7)                                | 8.09, d (8.9)                                |
|             | <b>3-Galactosyl</b>                          | <b>3-Glucosyl</b>                            | <b>3-arabinosyl</b>                          | <b>3-Glucosyl</b>                            | <b>3-Rhamnosyl</b>                           | <b>3-Glucosyl</b>                            | <b>3-Rhamnosyl</b>                           |                                              |
| <b>1''</b>  | 5.44, d (7.6)                                | 5.47, d (7.3)                                | 5.36, d (5.1)                                | 5.13, d (6.6)                                | 5.84, s                                      | 5.46, d (7.5)                                | 5.65, brs                                    |                                              |
| <b>2''</b>  | 3.17-3.85, m <sup>e</sup>                    | 3.08-4.29, m <sup>e</sup>                    | 3.75, t (5.5)                                | 3.3-3.6 <sup>e</sup>                         | 4.49 <sup>e</sup>                            | 3.19 <sup>e</sup>                            | 4.47, m <sup>e</sup>                         |                                              |
| <b>3''</b>  |                                              |                                              | 3.53, dd (6.8, 3.0)                          |                                              | 3.84 <sup>e</sup>                            | 3.21 <sup>e</sup>                            | 4.11, dd, (2.7,10.0)                         |                                              |
| <b>4''</b>  |                                              |                                              | 3.65, m <sup>e</sup>                         |                                              | 3.49 <sup>e</sup>                            | 3.09 <sup>e</sup>                            | 3.75, m <sup>e</sup>                         |                                              |
| <b>5''</b>  |                                              |                                              | 3.58, dd, (11.5, 5.5)                        |                                              | 3.23 <sup>e</sup>                            | 3.09 <sup>e</sup>                            | 3.49-3.36, m <sup>e</sup>                    |                                              |
|             |                                              |                                              | 3.21, dd (11.4, 2.5)                         |                                              |                                              |                                              |                                              |                                              |
| <b>6''</b>  |                                              |                                              |                                              | 3.80, br d (10.1)                            | 0.94, d (6.1)                                | 3.57, d (11.5)                               | 1.03 (d, J = 6.1) <sup>e</sup>               |                                              |
|             |                                              |                                              |                                              | 3.3-3.6 <sup>e</sup>                         |                                              | 3.33, d (11.4, 4.2)                          |                                              |                                              |
|             | <b>7-Rhamnosyl</b>                           | <b>7-Rhamnosyl</b>                           | <b>7-Rhamnosyl</b>                           | <b>6''-Rhamnosyl</b>                         | <b>7-Rhamnosyl</b>                           |                                              | <b>7-Rhamnosyl</b>                           | <b>7-Rhamnosyl</b>                           |
| <b>1'''</b> | 5.55, s                                      | 5.55, s                                      | 5.55, s                                      | 4.5, d (1.5)                                 | 5.56, s                                      |                                              | 5.51, br s                                   | 5.55, s                                      |
| <b>2'''</b> | 3.17-3.85, m                                 | 3.08-4.29, m <sup>e</sup>                    | 3.84, br s                                   | 3.65, br s                                   | 4.06, br s                                   |                                              | 4.05, br s                                   | 3.85, br s                                   |
| <b>3'''</b> |                                              |                                              | 3.64, dd (9.3, 3.2)                          | 3.51, d (9.0)                                | 3.86 <sup>e</sup>                            |                                              | 3.83, m <sup>e</sup>                         | 3.66, m                                      |
| <b>4'''</b> |                                              |                                              | 3.30 <sup>e</sup>                            | 3.3-3.6 <sup>e</sup>                         | 3.49 <sup>e</sup>                            |                                              | 3.48, m <sup>e</sup>                         | 3.31, m                                      |

|                 |               |               |                      |               |                              |                           |               |
|-----------------|---------------|---------------|----------------------|---------------|------------------------------|---------------------------|---------------|
| 5'''            |               |               | 3.43, dq (12.4, 6.2) |               | 3.66 <sup>e</sup>            | 3.70–3.64, m <sup>e</sup> | 3.47, m       |
| 6'''            | 1.12, d (6.2) | 1.11, d (6.1) | 1.12, d (6.2)        | 1.12, d (6.1) | 1.30, d (6.1)                | 1.28, d (6.1)             | 1.14, d (6.1) |
|                 |               |               |                      |               | <b>2''-Glucosyl</b>          | <b>2''-Glucosyl</b>       |               |
| 1''''           |               |               |                      |               | 4.56, d (7.2)                | 4.51, d (7.8)             |               |
| 2''''           |               |               |                      |               | 3.23 <sup>e</sup>            | 3.25, m <sup>e</sup>      |               |
| 3''''           |               |               |                      |               | 3.39 <sup>e</sup>            | 3.35, m <sup>e</sup>      |               |
| 4''''           |               |               |                      |               | 3.32 <sup>e</sup>            | 3.31 <sup>e</sup>         |               |
| 5''''           |               |               |                      |               | 3.32 <sup>e</sup>            | 3.36, m <sup>e</sup>      |               |
| 6''''           |               |               |                      |               | 3.86 <sup>e</sup>            | 4.49, m <sup>e</sup>      |               |
|                 |               |               |                      |               | 3.71 <sup>e</sup>            | 4.18, dd (5.9, 12.0)      |               |
|                 |               |               |                      |               | <b>3''-Glucosyl</b>          | <b>3''-Glucosyl</b>       |               |
| 1'''''          |               |               |                      |               | 4.45, d (7.2)                | 4.75, d (7.8)             |               |
| 2'''''          |               |               |                      |               | 3.35 <sup>e</sup>            | 3.32, m <sup>e</sup>      |               |
| 3'''''          |               |               |                      |               | 3.47 <sup>e</sup>            | 3.36, m <sup>e</sup>      |               |
| 4'''''          |               |               |                      |               | 3.29 <sup>e</sup>            | 3.28, m <sup>e</sup>      |               |
| 5'''''          |               |               |                      |               | 3.74 <sup>e</sup>            | 3.71, m <sup>e</sup>      |               |
| 6'''''          |               |               |                      |               | 4.53 <sup>e</sup>            | 4.56, m <sup>e</sup>      |               |
|                 |               |               |                      |               | 4.42 <sup>e</sup>            | 4.41, m <sup>e</sup>      |               |
|                 |               |               |                      |               | <b>6''''-(E)-p-coumaroyl</b> | <b>4''-Glucosyl</b>       |               |
| 1''''''         |               |               |                      |               |                              | 4.71, d (7.9)             |               |
| 2''''''         |               |               |                      |               | 6.24, d (15.9)               | 3.08, t (8.5)             |               |
| 3''''''         |               |               |                      |               | 7.53, d (15.9)               | 3.30, m <sup>e</sup>      |               |
| 4''''''         |               |               |                      |               |                              | 3.25, m <sup>e</sup>      |               |
| 5''''''/9'''''' |               |               |                      |               | 7.06, d (8.5)                | 3.22, m <sup>e</sup>      |               |

|                 |               |                                              |
|-----------------|---------------|----------------------------------------------|
| 6''''/8''''     | 6.34, d (8.5) | 3.80, m <sup>e</sup><br>3.62, m <sup>e</sup> |
|                 |               | <b>6''''-(E)-p-coumaroyl</b>                 |
| 1''''           |               |                                              |
| 2''''           |               | 6.11, d (15.9)                               |
| 3''''           |               | 7.42, d (15.9)                               |
| 4''''           |               |                                              |
| 5''''/<br>9'''' |               | 7.24, d (8.5)                                |
| 6''''/<br>8'''' |               | 6.65, d (8.5)                                |
| 7''''           |               |                                              |
|                 |               | <b>6''''-(E)-p-coumaroyl</b>                 |
| 1''''           |               |                                              |
| 2''''           |               | 6.15, d (15.9)                               |
| 3''''           |               | 7.45, d (15.9)                               |
| 4''''           |               |                                              |
| 5''''/<br>9'''' |               | 6.95, d (8.6)                                |
| 6''''/<br>8'''' |               | 6.27, d (8.6)                                |
| 7''''           |               |                                              |

---

<sup>a</sup> Recorded in DMSO-*d*6 at 600 MHz; <sup>b</sup> Recorded in DMSO-*d*6 at 500 MHz; <sup>c</sup> Recorded in methanol-*d*4 at 400 MHz; <sup>d</sup> Recorded in methanol-*d*4 at 500 MHz; <sup>e</sup> Overlapped.

1 **Table S2.** <sup>13</sup>C NMR data for compounds **1–6, 8 and 9.**

| position     | <b>1<sup>a</sup></b> | <b>2<sup>b</sup></b> | <b>3<sup>a</sup></b> | <b>4<sup>c</sup></b> | <b>5<sup>d</sup></b> | <b>6<sup>a</sup></b> | <b>8<sup>c</sup></b> | <b>9<sup>b</sup></b> |
|--------------|----------------------|----------------------|----------------------|----------------------|----------------------|----------------------|----------------------|----------------------|
|              | $\delta_C$           | $\delta_C$           | $\delta_C$           | $\delta_C$           | $\delta_C$           | $\delta_C$           | $\delta_C$           | $\delta_C$           |
| <b>2</b>     | 156.9                | 156.8                | 156.7                | 161.5                | 158.5                | 156.1                | 158.0                | 147.5                |
| <b>3</b>     | 133.5                | 133.5                | 133.8                | 135.5                | 135.4                | 133.1                | 136.1                | 136.1                |
| <b>4</b>     | 177.7                | 177.4                | 177.7                | 179.4                | 179.2                | 177.4                | 179.2                | 176.1                |
| <b>5</b>     | 160.9                | 160.1                | 160.8                | 163.0                | 162.5                | 161.2                | 162.5                | 160.4                |
| <b>6</b>     | 98.4                 | 98.4                 | 99.4                 | 100.0                | 100.6                | 98.9                 | 100.4                | 98.8                 |
| <b>7</b>     | 161.6                | 161.6                | 161.6                | 166.0                | 163.4                | 164.8                | 163.2                | 161.4                |
| <b>8</b>     | 94.5                 | 94.5                 | 94.5                 | 94.9                 | 95.3                 | 93.7                 | 95.3                 | 94.3                 |
| <b>9</b>     | 156.0                | 156.0                | 155.9                | 158.5                | 157.7                | 156.4                | 157.4                | 155.8                |
| <b>10</b>    | 105.6                | 105.7                | 105.6                | 105.6                | 107.5                | 103.8                | 107.5                | 104.7                |
| <b>1'</b>    | 120.7                | 120.8                | 120.5                | 122.7                | 122.3                | 120.8                | 122.3                | 121.6                |
| <b>2'</b>    | 131.1                | 131.0                | 131.6                | 132.4                | 131.9                | 130.8                | 131.9                | 129.7                |
| <b>3'</b>    | 115.1                | 115.2                | 115.3                | 116.1                | 116.6                | 115.1                | 116.6                | 115.5                |
| <b>4'</b>    | 160.3                | 160.9                | 160.3                | 159.4                | 161.7                | 160.0                | 161.4                | 159.4                |
| <b>5'</b>    | 115.1                | 115.2                | 115.3                | 116.1                | 116.6                | 115.1                | 116.6                | 115.5                |
| <b>6'</b>    | 131.1                | 131.0                | 131.6                | 132.4                | 131.9                | 130.8                | 131.9                | 159.4                |
|              | <i>3-Galactosyl</i>  | <i>3-Glucosyl</i>    | <i>3-arabinosyl</i>  | <i>3-Glucosyl</i>    | <i>3-Rhamnosyl</i>   | <i>3-Glucosyl</i>    | <i>3-Rhamnosyl</i>   |                      |
| <b>1''</b>   | 101.5                | 100.7                | 101.2                | 104.6                | 101.3                | 100.9                | 101.5                |                      |
| <b>2''</b>   | 71.6                 | 74.2                 | 70.7                 | 75.7                 | 80.5                 | 74.2                 | 81.7                 |                      |
| <b>3''</b>   | 73.1                 | 76.4                 | 71.5                 | 78.1                 | 81.7                 | 76.4                 | 80.8                 |                      |
| <b>4''</b>   | 67.9                 | 70.2                 | 66.0                 | 71.4                 | 71.5                 | 69.9                 | 78.3                 |                      |
| <b>5''</b>   | 75.9                 | 77.6                 | 64.2                 | 77.2                 | 71.8                 | 77.5                 | 70.7                 |                      |
| <b>6''</b>   | 60.2                 | 60.9                 |                      | 68.6                 | 17.7                 | 60.8                 | 17.9                 |                      |
|              | <i>7-Rhamnosyl</i>   | <i>7-Rhamnosyl</i>   | <i>7-Rhamnosyl</i>   | <i>6''-Rhamnosyl</i> | <i>7-Rhamnosyl</i>   |                      | <i>7-Rhamnosyl</i>   | <i>7-Rhamnosyl</i>   |
| <b>1'''</b>  | 99.8                 | 99.4                 | 98.3                 | 102.4                | 99.8                 |                      | 99.7                 | 98.4                 |
| <b>2'''</b>  | 70.1                 | 69.9                 | 70.1                 | 72.1                 | 71.7                 |                      | 71.7                 | 70.1                 |
| <b>3'''</b>  | 70.3                 | 70.1                 | 70.2                 | 73.9                 | 72.1                 |                      | 72.0                 | 70.3                 |
| <b>4'''</b>  | 71.2                 | 71.6                 | 71.6                 | 75.7                 | 73.6                 |                      | 73.6                 | 71.6                 |
| <b>5'''</b>  | 69.8                 | 69.8                 | 69.8                 | 69.7                 | 71.1                 |                      | 71.1                 | 69.9                 |
| <b>6'''</b>  | 17.9                 | 17.9                 | 17.9                 | 17.9                 | 18.1                 |                      | 18.2                 | 18.0                 |
|              |                      |                      |                      |                      | <i>2''-Glucosyl</i>  |                      | <i>2''-Glucosyl</i>  |                      |
| <b>1''''</b> |                      |                      |                      |                      | 105.9                |                      | 106.0                |                      |
| <b>2''''</b> |                      |                      |                      |                      | 75.3                 |                      | 75.2                 |                      |
| <b>3''''</b> |                      |                      |                      |                      | 77.8                 |                      | 78.1                 |                      |
| <b>4''''</b> |                      |                      |                      |                      | 77.8                 |                      | 71.8                 |                      |
| <b>5''''</b> |                      |                      |                      |                      | 77.9                 |                      | 75.1                 |                      |
| <b>6''''</b> |                      |                      |                      |                      | 62.8                 |                      | 64.4                 |                      |



|              |                     |                     |
|--------------|---------------------|---------------------|
| 1''''        | <i>3''-Glucosyl</i> | <i>3''-Glucosyl</i> |
| 2''''        | 106.1               | 105.3               |
| 3''''        | 75.3                | 75.3                |
| 4''''        | 77.8                | 77.6                |
| 5''''        | 72.4                | 72.4                |
| 6''''        | 75.9                | 75.9                |
|              | 65.2                | 65.2                |
| 1''''''      | <i>6''''-(E)-p-</i> | <i>4''-Glucosyl</i> |
| 2''''''      | 168.9               | 104.0               |
| 3''''''      | 114.8               | 75.7                |
| 4''''''      | 146.8               | 78.6                |
| 5''''''      | 126.6               | 71.8                |
| 6''''''      | 130.5               | 77.6                |
| 7''''''      | 116.3               | 62.8                |
|              | 160.7               |                     |
| 1''''''''    |                     | <i>6''''-(E)-p-</i> |
| 2''''''''    |                     | 169.0               |
| 3''''''''    |                     | 114.8               |
| 4''''''''    |                     | 146.7               |
| 5''''''''/   |                     | 126.9               |
| 6''''''''/   |                     | 131.0               |
| 8''''''''    |                     | 116.5               |
| 7''''''''    |                     | 160.9               |
| 1''''''''''  |                     | <i>6''''-(E)-p-</i> |
| 2''''''''''  |                     | 168.9               |
| 3''''''''''  |                     | 114.7               |
| 4''''''''''  |                     | 146.5               |
| 5''''''''''/ |                     | 126.5               |
| 6''''''''''/ |                     | 130.4               |
| 8''''''''''  |                     | 116.3               |
| 7''''''''''  |                     | 160.6               |

<sup>a</sup> Recorded in DMSO-*d*6 at 150 MHz; <sup>b</sup> Recorded in DMSO-*d*6 at 125 MHz; <sup>c</sup> Recorded in methanol-*d*4 at 100 MHz; <sup>d</sup> Recorded in methanol-*d*4 at 125 MHz.

**Table S3. <sup>1</sup>H and <sup>13</sup>C NMR data for compound 7**

| position           | <b>7<sup>a</sup></b>                     |                     | No.                          | <b>7<sup>b</sup></b>                     |                     |
|--------------------|------------------------------------------|---------------------|------------------------------|------------------------------------------|---------------------|
|                    | $\delta_{\text{H}}$ , mult ( <i>J</i> in | $\delta_{\text{C}}$ |                              | $\delta_{\text{H}}$ , mult ( <i>J</i> in | $\delta_{\text{C}}$ |
| <b>2</b>           |                                          | 157.1               | <b>2''-Glucosyl</b>          |                                          |                     |
| <b>3</b>           |                                          | 134.6               | <b>1''''</b>                 | 4.32, d (7.8)                            | 106.0               |
| <b>4</b>           |                                          | 177.9               | <b>2''''</b>                 | 3.05, t (8.3)                            | 73.7                |
| <b>5</b>           |                                          | 161.0               | <b>3''''</b>                 | 3.21, m                                  | 76.0                |
| <b>6</b>           | 6.40, brs                                | 99.4                | <b>4''''</b>                 | 3.18, m                                  | 69.8                |
| <b>7</b>           |                                          | 161.7               | <b>5''''</b>                 | 3.33, m <sup>c</sup>                     | 73.6                |
| <b>8</b>           | 6.65, brs                                | 94.5                | <b>6''''</b>                 | 4.23, br d (11.8)                        | 63.0                |
| <b>9</b>           |                                          | 155.9               |                              | 4.12, dd (11.8, 5.5)                     |                     |
| <b>10</b>          |                                          | 105.7               | <b>6''''-(E)-p-coumaroyl</b> |                                          |                     |
| <b>1'</b>          |                                          | 120.1               | <b>1'''''</b>                |                                          | 166.3               |
| <b>2'</b>          | 7.75, d (8.7)                            | 130.6               | <b>2'''''</b>                | 6.14, d (15.9)                           | 113.8               |
| <b>3'</b>          | 6.92, d (8.7)                            | 115.4               | <b>3'''''</b>                | 7.41, d (15.9)                           | 144.6               |
| <b>4'</b>          |                                          | 160.3               | <b>4'''''</b>                |                                          | 124.9               |
| <b>5'</b>          | 6.92, d (8.7)                            | 115.4               | <b>5'''''</b>                | 7.35, d (8.6)                            | 130.0               |
| <b>6'</b>          | 7.75, d (8.7)                            | 130.6               | <b>6'''''</b>                | 6.68, d (8.6)                            | 115.6               |
| <b>3-Rhamnosyl</b> |                                          |                     | <b>7'''''</b>                |                                          | 159.8               |
| <b>1''</b>         | 5.63, s                                  | 100.6               | <b>8'''''</b>                | 6.68, d (8.6)                            | 115.6               |
| <b>2''</b>         | 4.14, br s                               | 81.8                | <b>9'''''</b>                | 7.35, d (8.6)                            | 130.0               |
| <b>3''</b>         | 3.55, dd (9.6, 3.2)                      | 70.1                | 5-OH                         | 12.53, s                                 |                     |
| <b>4''</b>         | 3.13, m <sup>c</sup>                     | 71.7                |                              |                                          |                     |
| <b>5''</b>         | 3.37, m <sup>c</sup>                     | 70.2                |                              |                                          |                     |
| <b>6''</b>         | 0.92, d (6.2)                            | 17.4                |                              |                                          |                     |
| <b>7-Rhamnosyl</b> |                                          |                     |                              |                                          |                     |
| <b>1'''</b>        | 5.51, s                                  | 98.5                |                              |                                          |                     |
| <b>2'''</b>        | 3.84, br s                               | 69.8                |                              |                                          |                     |
| <b>3'''</b>        | 3.63, dd (9.3, 3.2)                      | 70.1                |                              |                                          |                     |
| <b>4'''</b>        | 3.29, m <sup>c</sup>                     | 71.6                |                              |                                          |                     |
| <b>5'''</b>        | 3.44, m <sup>c</sup>                     | 70.1                |                              |                                          |                     |
| <b>6'''</b>        | 1.12, d (6.1)                            | 17.9                |                              |                                          |                     |

<sup>a</sup> Recorded in DMSO-*d*<sub>6</sub> at 600 MHz; <sup>b</sup> Recorded in DMSO-*d*<sub>6</sub> at 150 MHz; <sup>c</sup> Overlapped

**Table S4.**

| Gene<br>(human) | Sequences of primer used |                        |
|-----------------|--------------------------|------------------------|
| p16INK4A        | Forward                  | ATATGCCTTCCCCCACTACC   |
|                 | Reverse                  | CGTGAGTGCTCACTCCAGAA   |
| p21CIP1         | Forward                  | ATGAAATTCACCCCCTTCC    |
|                 | Reverse                  | CCCTAGGCTGTGCTCACTTC   |
| p53             | Forward                  | GGCCCACTTCACCGTACTAA   |
|                 | Reverse                  | GTGGTTTCAAGGCCAGATGT   |
| Glb1            | Forward                  | TTTGACTACCTGCGCTTCT    |
|                 | Reverse                  | AGTCCACCGTGGTGTAGAGG   |
| IL-6            | Forward                  | AGGAGACTTGCCTGGTGAAA   |
|                 | Reverse                  | CAGGGGTGGTTATTGCATCT   |
| IL-8            | Forward                  | GTGCAGTTTTGCCAAGGAGT   |
|                 | Reverse                  | CTCTGCACCCAGTTTTCTT    |
| IL-1 $\alpha$   | Forward                  | ATCAGTACCTCACGGCTGCT   |
|                 | Reverse                  | TGGGTATCTCAGGCATCTCC   |
| IL-1 $\beta$    | Forward                  | CTGTCCTGCGTGTTGAAAGA   |
|                 | Reverse                  | TTCTGCTTGAGAGGTGCTGA   |
| 18s             | Forward                  | CTACCACATCCAAGGAAGCA   |
|                 | Reverse                  | TTTTTCGTCACCTACCTCCCCG |
